# Supplementary material
Source: MDPI journal article supplement (https://www.mdpi.com/1661-3821/1/1/4)
Supplement: s1 [file s1]

## Supplementary Materials

# Friends or Foes? Cytotoxicity, HPTLC and NMR Analyses of Some Important Naturally Occurring Hydroxyanthraquinones

Bassam S.M. Al Kazman<sup>1,2,\*</sup>, and Jose M. Prieto<sup>1,3,\*</sup>

<sup>1</sup> The School of Pharmacy, University College London, 29-39 Brunswick Square, London WC1N 1AX, United Kingdom.

<sup>2</sup> Department of Pharmacognosy, School of Pharmacy, Najran University, Najran 1988, Saudi Arabia <sup>3</sup> School of Pharmacy and Biomolecular Sciences, Liverpool John Moores University, Liverpool L3 3AF, United Kingdom.

\* Correspondence: (B.S.M.A-K) [bassam.alkazman@sydney.edu.au](mailto:bassam.alkazman@sydney.edu.au); (J.M.P) [j.m.prietogarcia@ljamu.ac.uk](mailto:j.m.prietogarcia@ljamu.ac.uk)

## Table of Contents

|          |                               |           |
|----------|-------------------------------|-----------|
| <b>1</b> | <b>NMR PREDICTION</b> .....   | <b>4</b>  |
| <b>2</b> | <b>EXPERIMENTAL NMR</b> ..... | <b>10</b> |

## List of Figures

|                                                                                                                          |    |
|--------------------------------------------------------------------------------------------------------------------------|----|
| Figure S1-1 2D and 3D chemical structure of Hydroxyanthraquinones (Source: ChemDraw Professional)                        | 4  |
| Figure S1-2 Chem NMR <sup>1</sup> H Estimation of Hydroxyanthraquinones (Source: ChemDraw Professional)                  | 4  |
| Figure S1-3 Chem NMR <sup>13</sup> C Estimation of Hydroxyanthraquinones (Source: ChemDraw Professional)                 | 4  |
| Figure S1-4 Chem NMR <sup>1</sup> H Estimation of Aloe-emodin (Source: ChemDraw Professional) .....                      | 5  |
| Figure S1-5 Chem NMR <sup>13</sup> C Estimation of Aloe-emodin (Source: ChemDraw Professional) .....                     | 5  |
| Figure S1-6 Chem NMR <sup>13</sup> C Estimation of Rhein (Source: ChemDraw Professional) .....                           | 5  |
| Figure S1-7 <sup>1</sup> H and <sup>13</sup> C NMR Chemical Shift of Rhein (Source: Danielsen, Aksnes and Francis, 1992) | 6  |
| Figure S1-8 Chem NMR <sup>1</sup> H Estimation of Catenarin (Source: ChemDraw Professional) .....                        | 6  |
| Figure S1-9 Chem NMR <sup>13</sup> C Estimation of Catenarin (Source: ChemDraw Professional) .....                       | 6  |
| Figure S1-10 Chem NMR <sup>1</sup> H Estimation of Barbaloin (Source: ChemDraw Professional) .....                       | 7  |
| Figure S1-11 Chem NMR <sup>13</sup> C Estimation of Barbaloin (Source: ChemDraw Professional) .....                      | 7  |
| Figure S1-12 Chem NMR <sup>1</sup> H Estimation of Chrysazin (Source: ChemDraw Professional) .....                       | 7  |
| Figure S1-13 Chem NMR <sup>13</sup> C Estimation of Chrysazin (Source: ChemDraw Professional) .....                      | 8  |
| Figure S1-14 Chem NMR <sup>1</sup> H Estimation of Rugulosin (Source: ChemDraw Professional) .....                       | 8  |
| Figure S1-15 Chem NMR <sup>13</sup> C Estimation of Rugulosin (Source: ChemDraw Professional) .....                      | 9  |
| Figure S1-16 Chem NMR <sup>1</sup> H Estimation of Helminthosporin (Source: ChemDraw Professional) .....                 | 9  |
| Figure S1-17 Chem NMR <sup>13</sup> C Estimation of Helminthosporin (Source: ChemDraw Professional) .....                | 9  |
| Figure S2-1 <sup>1</sup> H NMR Chemical Shift of Aloe-emodin .....                                                       | 11 |
| Figure S2-2 <sup>13</sup> C NMR Chemical Shift of Aloe-emodin .....                                                      | 11 |
| Figure S2-3 Dept 135 of Aloe-emodin .....                                                                                | 12 |
| Figure S2-4 Dept 90 of Aloe-emodin .....                                                                                 | 12 |

|                                                                          |    |
|--------------------------------------------------------------------------|----|
| Figure S2-5 Cosy of Aloe-emodin .....                                    | 13 |
| Figure S2-6 Expand cosy of Aloe-emodin .....                             | 13 |
| Figure S2-7 HMQC of Aloe-emodin.....                                     | 14 |
| Figure S2-8 Expand HMQC of Aloe-emodin .....                             | 14 |
| Figure S2-9 HMBC of Aloe-emodin.....                                     | 15 |
| Figure S2-10 <sup>1</sup> H NMR Chemical Shift of catenarin .....        | 16 |
| Figure S2-11 <sup>13</sup> C NMR Chemical Shift of catenarin.....        | 16 |
| Figure S2-12 Dept 135 of catenarin .....                                 | 17 |
| Figure S2-13 Dept 90 of catenarin .....                                  | 17 |
| Figure S2-14 Cosy of catenarin.....                                      | 18 |
| Figure S2-15 Expand cosy of catenarin .....                              | 18 |
| Figure S2-16 HMQC of catenarin.....                                      | 19 |
| Figure S2-17 Expand HMQC of catenarin .....                              | 19 |
| Figure S2-18 HMBC of catenarin .....                                     | 20 |
| Figure S2-19 <sup>1</sup> H NMR Chemical Shift of chrysazin .....        | 21 |
| Figure S2-20 <sup>13</sup> C NMR Chemical Shift of chrysazin.....        | 21 |
| Figure S2-21 Dept 135 of chrysazin .....                                 | 22 |
| Figure S2-22 Dept 90 of chrysazin .....                                  | 22 |
| Figure 2-23 Cosy of chrysazin .....                                      | 23 |
| Figure S2-24 Expand cosy of chrysazin.....                               | 23 |
| Figure S2-25 HMQC of chrysazin .....                                     | 24 |
| Figure S2-26 Expand HMQC of chrysazin .....                              | 24 |
| Figure S2-27 HMBC of chrysazin.....                                      | 25 |
| Figure S2-28 <sup>1</sup> H NMR Chemical Shift of rhein.....             | 26 |
| Figure S2-29 <sup>13</sup> C NMR Chemical Shift of rhein.....            | 27 |
| Figure 2-30 Dept 135 of rhein .....                                      | 27 |
| Figure S2-31 Dept 90 of rhein .....                                      | 28 |
| Figure S2-32 Cosy of rhein.....                                          | 28 |
| Figure S2-33 Expand cosy of rhein .....                                  | 29 |
| Figure S2-34 HMQC of rhein.....                                          | 29 |
| Figure S2-35 Expand HMQC of rhein .....                                  | 30 |
| Figure S2-36 HMBC of rhein .....                                         | 30 |
| Figure S2-37 <sup>1</sup> H NMR Chemical Shift of helminthosporin.....   | 32 |
| Figure S2-38 <sup>13</sup> C NMR Chemical Shift of helminthosporin ..... | 32 |
| Figure S2-39 Dept 135 of helminthosporin .....                           | 33 |

|                                                                   |    |
|-------------------------------------------------------------------|----|
| Figure S2-40 Dept 90 of helminthosporin .....                     | 33 |
| Figure S2-41 Cosy of helminthosporin .....                        | 34 |
| Figure S2-42 Expand cosy of helminthosporin .....                 | 34 |
| Figure S2-43 HMQC of helminthosporin .....                        | 35 |
| Figure S2-44 Expand HMQC of helminthosporin .....                 | 35 |
| Figure 9-53 HMBC of helminthosporin .....                         | 36 |
| Figure S2-46 1H NMR Chemical Shift of rugulosin .....             | 37 |
| Figure S2-47 13C NMR Chemical Shift of rugulosin .....            | 37 |
| Figure S2-48 Dept 135 of rugulosin .....                          | 38 |
| Figure S2-49 Dept 90 of rugulosin .....                           | 38 |
| Figure S2-50 Cosy of rugulosin .....                              | 39 |
| Figure S2-51 HMQC of rugulosin .....                              | 39 |
| Figure S2-52 Expand HMQC of rugulosin .....                       | 40 |
| Figure S2-53 HMBC of rugulosin .....                              | 40 |
| Figure S2-54 Expand HMBC of rugulosin .....                       | 41 |
| Figure S2-55 1H NMR Chemical Shift of barbaloin .....             | 42 |
| Figure S2-56 13C NMR Chemical Shift of barbaloin .....            | 42 |
| Figure S2-57 Dept 135 of barbaloin .....                          | 43 |
| Figure S2-58 Dept 90 of barbaloin .....                           | 43 |
| Figure S2-59 Cosy of barbaloin .....                              | 44 |
| Figure S2-60 HMQC of barbaloin .....                              | 44 |
| Figure S2-61 Expand HMQC of barbaloin .....                       | 45 |
| Figure S2-62 HMBC of barbaloin .....                              | 45 |
| Figure S2-63 Expand HMBC of barbaloin .....                       | 46 |
| List of Tables                                                    |    |
| Table S2-1 1H and 13C NMR Chemical Shift of Aloe-emodin .....     | 10 |
| Table S2-2 1H and 13C NMR Chemical Shift of catenarin .....       | 16 |
| Table S2-3 1H and 13C NMR Chemical Shift of chrysazin .....       | 20 |
| Table S2-4 1H and 13C NMR Chemical Shift of rhein .....           | 26 |
| Table S2-5 1H and 13C NMR Chemical Shift of helminthosporin ..... | 31 |

## 1. NMR Prediction

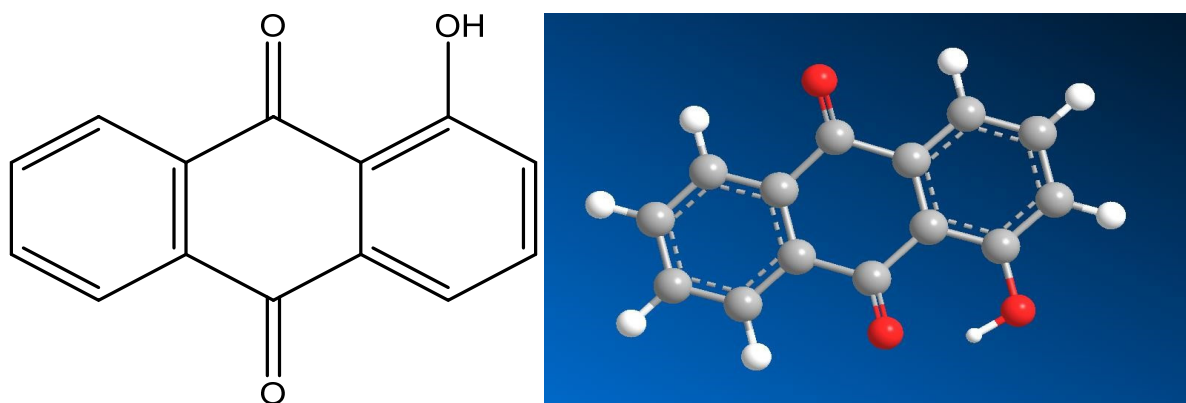

Figure S1-1 2D and 3D chemical structure of Hydroxyanthraquinones (Source: ChemDraw Professional).

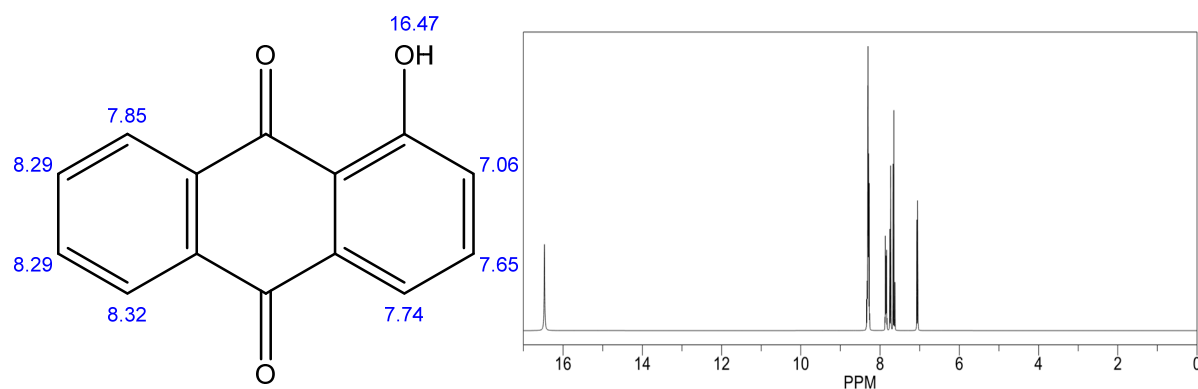

Figure S0-1 Chem NMR  $^1\text{H}$  Estimation of Hydroxyanthraquinones (Source: ChemDraw Professional)

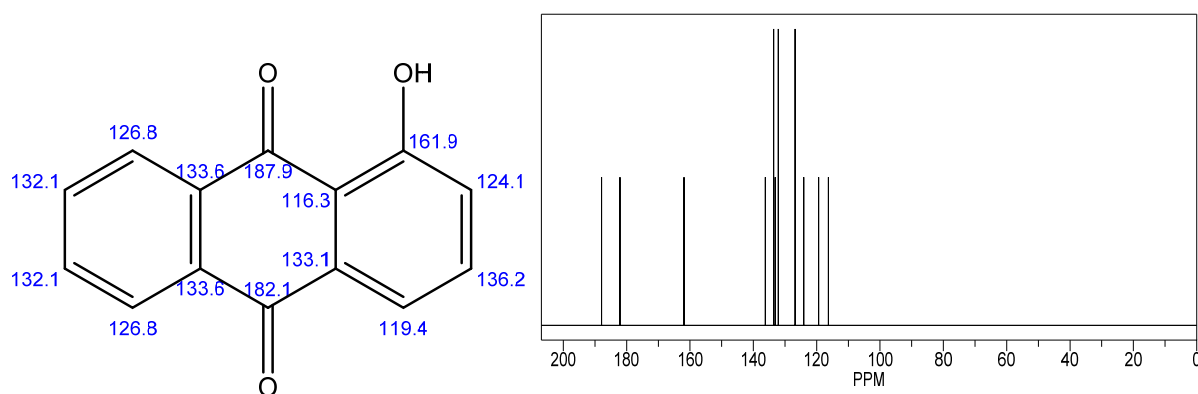

Figure S0-2 Chem NMR  $^{13}\text{C}$  Estimation of Hydroxyanthraquinones (Source: ChemDraw Professional)

*Aloe-emodin*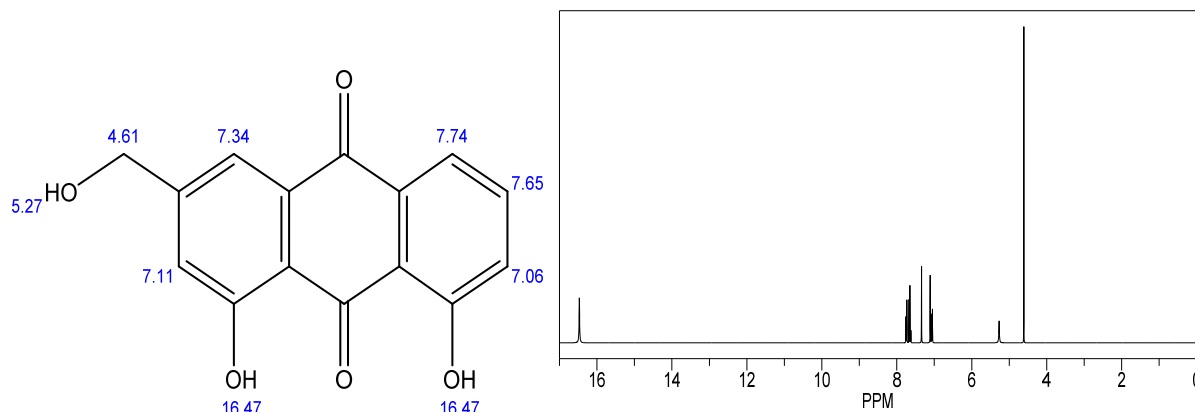

Figure S0-3 Chem NMR 1H Estimation of Aloe-emodin (Source: ChemDraw Professional)

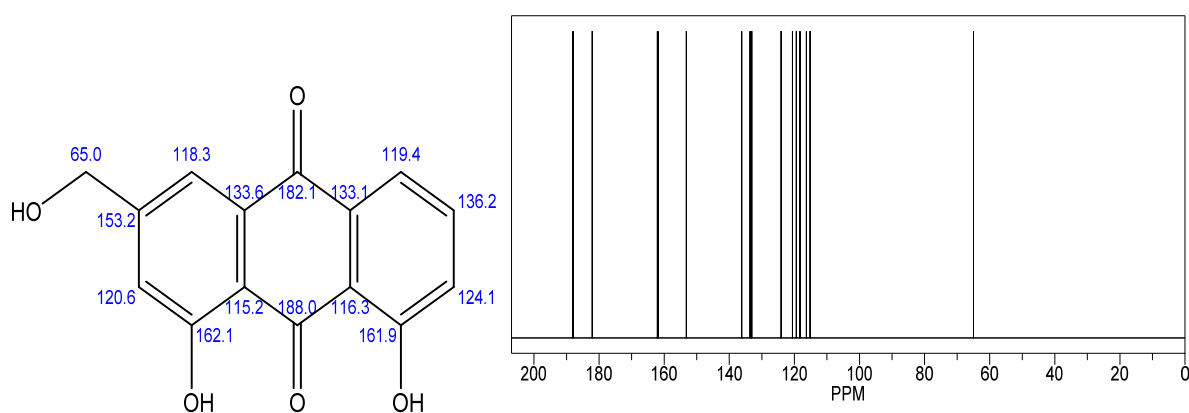

Figure S0-4 Chem NMR 13C Estimation of Aloe-emodin (Source: ChemDraw Professional)

As per literature “<sup>1</sup>H NMR (DMSO-d<sub>6</sub>):  $\delta$  = 4.62 (2H, d, J = 6 Hz), 5.60 (1H, t, J = 6 Hz), 7.29 (1H, s), 7.38 (1H, br d, J = 8.4 Hz), 7.72-7.69 (2H, m), 7.80 (1H, t, J = 8.4 Hz), 11.9 (2H, br s); <sup>13</sup>C NMR (DMSO-d<sub>6</sub>):  $\delta$  = 62.7, 115.2, 116.7, 117.8, 120.0, 121.4, 125.1, 133.9, 134.1, 138.0, 154.4, 162.0, 162.3, 182.2, 192.4.” (Sanchez et al., 2011)

*Rhein*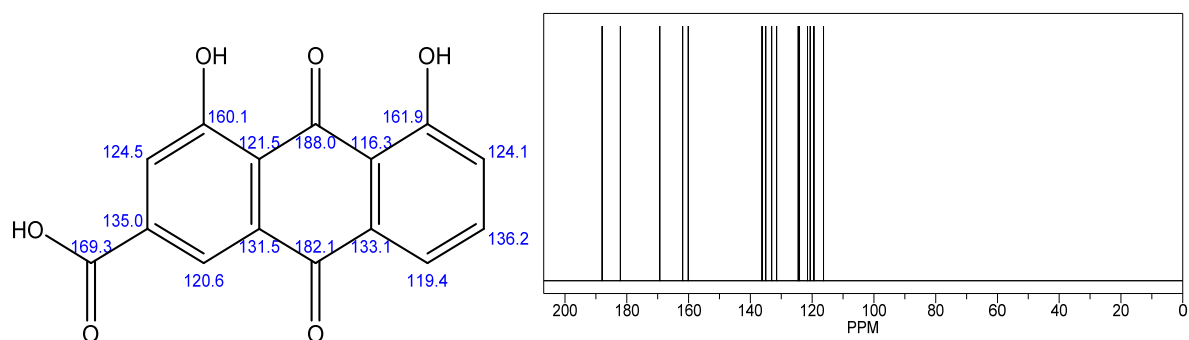

Figure S0-5 Chem NMR 13C Estimation of Rhein (Source: ChemDraw Professional)

| Table 1. <sup>1</sup> H NMR chemical shifts and coupling constants for anthraquinones 1–5 |                  |              |            |                 |            | Table 2. <sup>13</sup> C NMR chemical shifts for anthraquinones 1–5* |                  |              |            |                 |           |
|-------------------------------------------------------------------------------------------|------------------|--------------|------------|-----------------|------------|----------------------------------------------------------------------|------------------|--------------|------------|-----------------|-----------|
| Proton                                                                                    | Chrysophanol (1) | Physcion (2) | Emodin (3) | Aloe-emodin (4) | Rhein (5)  | Carbon                                                               | Chrysophanol (1) | Physcion (2) | Emodin (3) | Aloe-emodin (4) | Rhein (5) |
| H-2                                                                                       | 7.22             | 6.68         | 6.59       | 7.29            | 7.77       | C-1                                                                  | 161.67           | 165.20       | 164.54     | 161.72          | 161.51    |
| H-4                                                                                       | 7.55             | 7.36         | 7.12       | 7.69            | 8.14       | C-2                                                                  | 124.16           | 106.78       | 108.02     | 120.78          | 124.21    |
| H-5                                                                                       | 7.71             | 7.62         | 7.49       | 7.72            | 7.75       | C-3                                                                  | 149.26           | 166.56       | 165.64     | 153.80          | 138.20    |
| H-6                                                                                       | 7.80             | —            | —          | 7.80            | 7.84       | C-4                                                                  | 120.64           | 108.22       | 108.84     | 117.18          | 119.05    |
| H-7                                                                                       | 7.38             | 7.07         | 7.16       | 7.38            | 7.41       | C-5                                                                  | 119.41           | 121.29       | 120.58     | 119.43          | 119.48    |
| OH-1                                                                                      | 11.87            | 12.30        | 12.08      | 11.91           | —          | C-6                                                                  | 137.41           | 148.44       | 148.35     | 137.42          | 137.63    |
| OH-8                                                                                      | 11.97            | 12.11        | 12.01      | 11.97           | —          | C-7                                                                  | 124.49           | 124.51       | 124.23     | 124.49          | 124.64    |
| OH-3                                                                                      | —                | —            | 11.37      | 5.62            | —          | C-8                                                                  | 161.41           | 162.51       | 161.51     | 161.43          | 161.27    |
| CH <sub>3</sub>                                                                           | 2.44             | 2.44         | 2.41       | —               | —          | C-9                                                                  | 191.72           | 190.82       | 189.83     | 191.74          | 191.49    |
| OCH <sub>3</sub>                                                                          | —                | 3.93         | —          | —               | —          | C-10                                                                 | 181.57           | 182.05       | 181.48     | 181.59          | 181.25    |
| CH <sub>2</sub>                                                                           | —                | —            | —          | 4.63            | —          | C-11                                                                 | 133.40           | 133.23       | 132.91     | 133.54          | 133.41    |
| H-2(m)                                                                                    | 0.82, 1.15       | 2.57         | 2.46, 0.35 | 1.66            | 1.47       | C-12                                                                 | 115.94           | 113.69       | 113.46     | 116.01          | 116.33    |
| H-4(m)                                                                                    | 0.49, 1.15       | 2.57         | 2.28, 0.35 | 1.66            | 1.47       | C-13                                                                 | 113.85           | 110.27       | 109.06     | 114.57          | 118.48    |
| H-5(m)                                                                                    | 1.31             | 0.55, 0.92   | 0.35, 0.53 | 1.16            | 1.10       | C-14                                                                 | 133.10           | 135.27       | 135.21     | 133.22          | 133.61    |
| H-5(o)                                                                                    | 7.55             | —            | —          | 7.63            | 7.54       | CH <sub>3</sub>                                                      | 21.71            | 22.15        | 21.60      | —               | —         |
| H-6(o)                                                                                    | 7.55, 8.37       | —            | —          | 7.63, 8.29      | 7.54, 8.22 | OCH <sub>3</sub>                                                     | —                | 56.07        | —          | —               | —         |
| H-7(m)                                                                                    | 1.31             | 0.74, 0.92   | 0.35, 0.70 | 1.16            | 1.10       | CH <sub>2</sub>                                                      | —                | —            | —          | 62.15           | —         |
| H-7(o)                                                                                    | 8.37             | —            | —          | 8.29            | 8.22       | COOH                                                                 | —                | —            | —          | —               | 165.52    |
| CH <sub>3</sub> (m)                                                                       | 0.82, 0.49       | 0.55, 0.74   | 0.53, 0.70 | —               | —          |                                                                      |                  |              |            |                 |           |

Figure S0-6 <sup>1</sup>H and <sup>13</sup>C NMR Chemical Shift of Rhein (Source: Danielsen, Aksnes and Francis, 1992)

## Catenarin

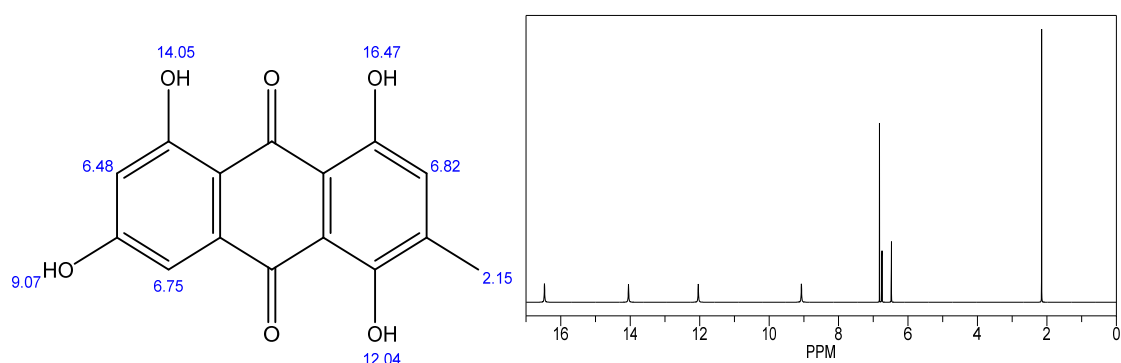Figure S0-7 Chem NMR <sup>1</sup>H Estimation of Catenarin (Source: ChemDraw Professional)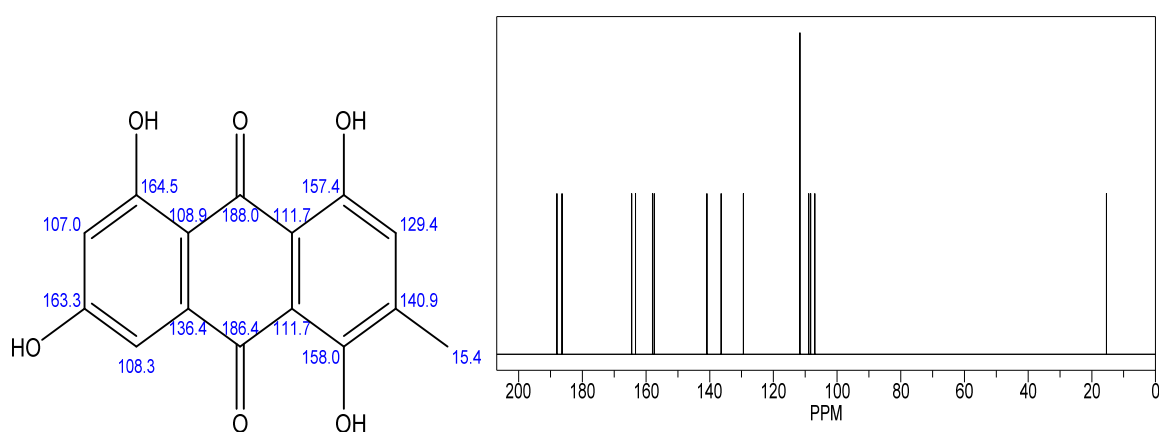Figure S0-8 Chem NMR <sup>13</sup>C Estimation of Catenarin (Source: ChemDraw Professional)

As per literature “<sup>1</sup>H NMR (CDCl<sub>3</sub>) spectrum was as follows: 6'-CH<sub>3</sub>: δH 2.35 (d, 3H, J<sub>6',7</sub> = 0.8 Hz); 2-H: δH 6.66 (d, 1H, J<sub>2,4</sub> = 2.4 Hz); 7-H: δH 7.13 (m, 1H, J<sub>7,6'</sub> = 0.8 Hz, J<sub>7,8</sub> = 0.5 Hz); 4H: δH 7.32 (d, 1H, J<sub>4,2</sub> = 2.4 Hz); OH: δH 12.35, 12.42, 13.34.” (Kalidhar, 1989).

**Barbaloin**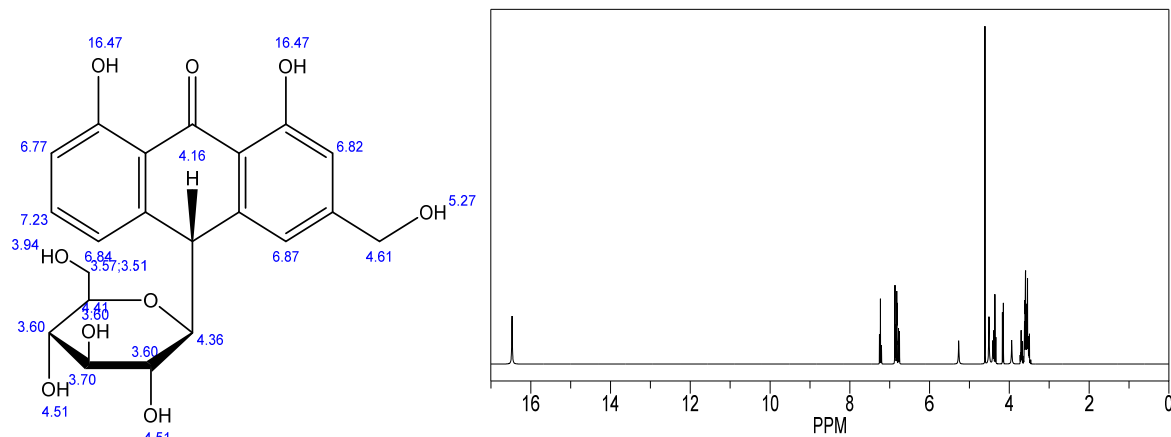**Figure S0-9 Chem NMR 1H Estimation of Barbaloin (Source: ChemDraw Professional)**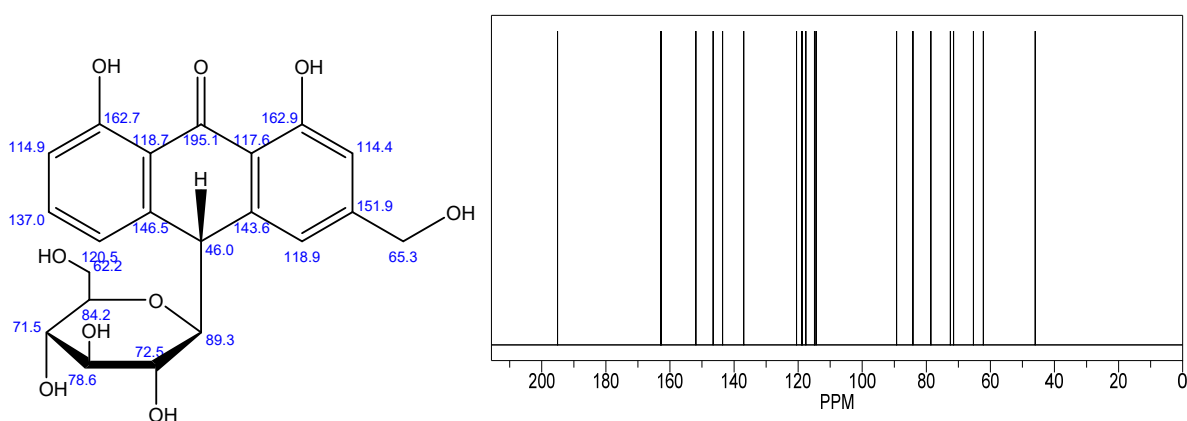**Figure S0-10 Chem NMR 13C Estimation of Barbaloin (Source: ChemDraw Professional)**

As per literature “<sup>1</sup>H NMR (400 MHz, MeOH-d<sub>4</sub>) δ 7.49 (1H, t,  $J_{4/7}$  7.8 Hz, H<sub>6</sub>), 7.07 (1H, H<sub>5</sub>), 7.05 (1H, s, H<sub>4</sub>), 6.88 (1H, s, H<sub>2</sub>), 6.82 (1H, d,  $J_{4/8}$  8.2 Hz, H<sub>7</sub>), 4.66 (1H, s, H<sub>15b</sub>), 4.65 (1H, s, H<sub>15a</sub>), 4.61 (1H, d,  $J_{10/9}$  4.9 Hz, H<sub>10</sub>), 3.56 (1H, dd,  $J_{11/4}$  11.4, 1.6 Hz, H-6b'), 3.41 (1H, dd,  $J_{9/7}$  9.7, 2.4 Hz, H-6a'), 3.37 (1H, m, H-1'), 3.25 (1H, t,  $J_{8/7}$  8.7 Hz, H-3'), 3.01 (1H, t,  $J_{8/2}$  8.7 Hz, H-2'), 2.91 (1H, br s, H-5'), 2.90 (1H, br s, H-4')” (Kim et al., 2017).

**Chrysazin**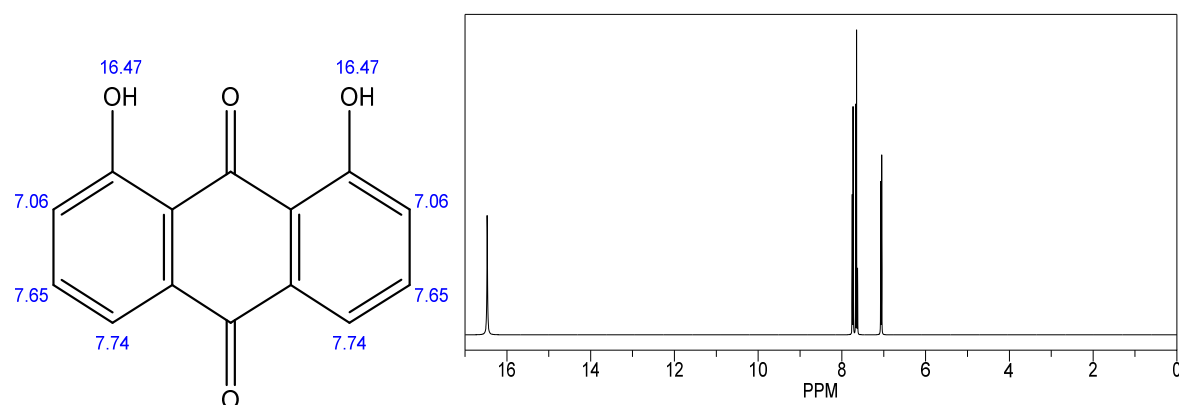**Figure S0-11 Chem NMR 1H Estimation of Chrysazin (Source: ChemDraw Professional)**

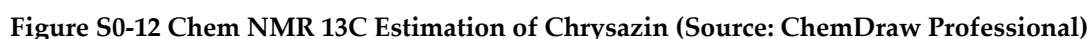

### Rugulosin

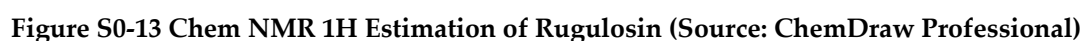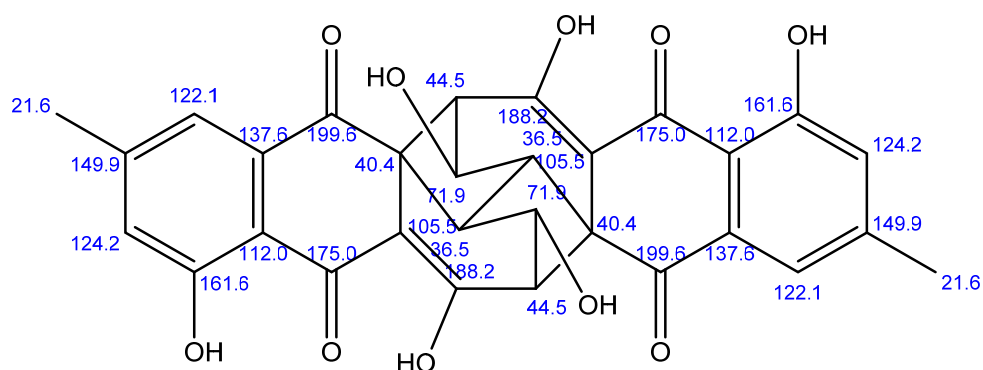



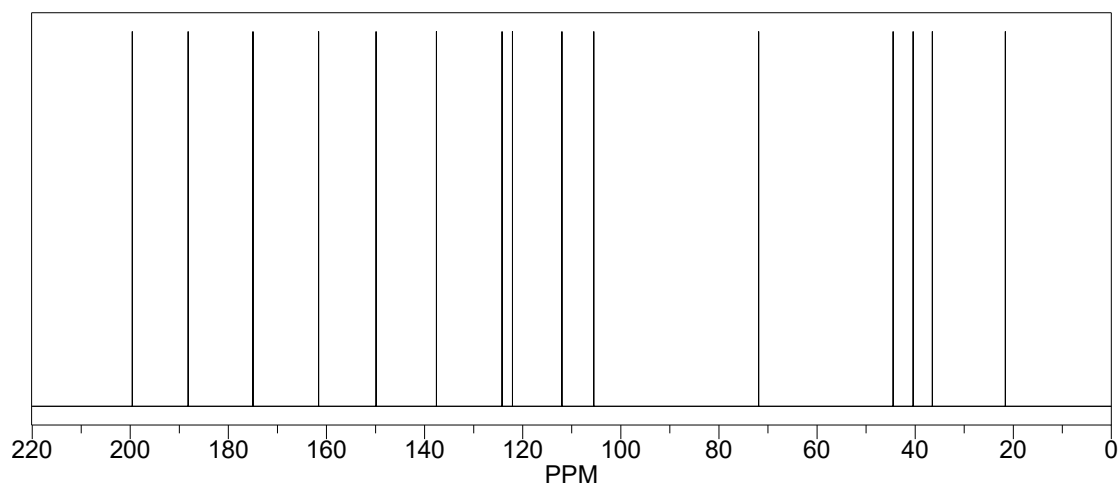

**Figure S0-14 Chem NMR  $^{13}\text{C}$  Estimation of Rugulosin (Source: ChemDraw Professional)**

As per literature “ $^1\text{H}$  NMR (DMSO- $d_6$ ) 14.7 (s, OH-1/OH-1’), 11.4 (s, OH-9/OH-9’), 7.44 (d, 1.2, H-6/H-6’), 7.18 (d, 1.2, H-8/H-8’), 4.38 (dd, 6.0, 2.3, H-3/H-3’), 3.36 (brs, H-4/H-4’), 2.77 (d, 6.0, H-2/H-2’), 2.41 (s, H-15/H-15’);  $^{13}\text{C}$  NMR 194.6, 186.7, 181.7, 160.8, 148.3, 132.7, 124.7, 121.2, 114.8, 106.8, 69.2, 59.0, 56.3, 48.4, 22.2” (Yamazaki et al., 2010).

### *Helminthosporin*

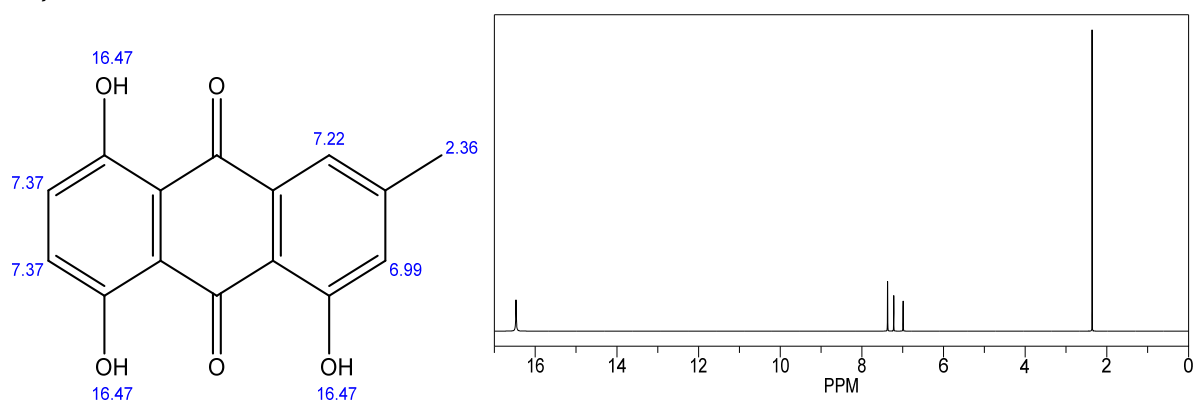

**Figure S0-15 Chem NMR  $^1\text{H}$  Estimation of Helminthosporin (Source: ChemDraw Professional)**

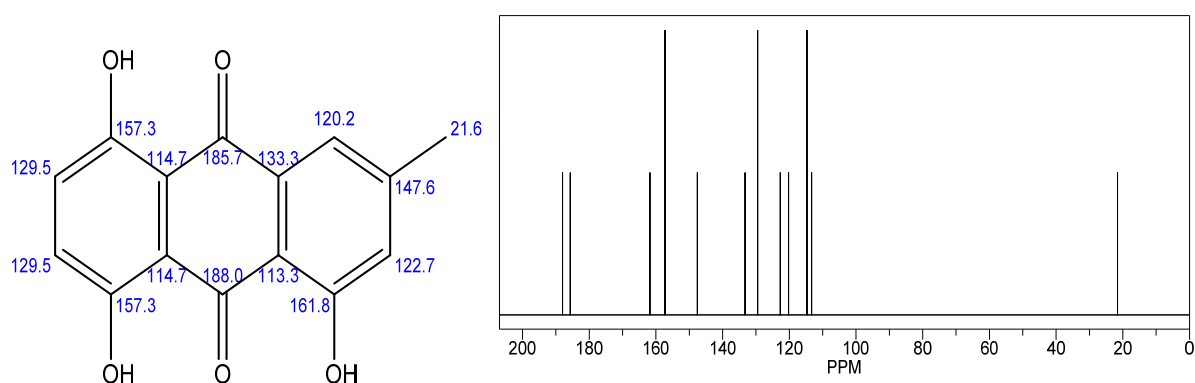

**Figure S0-16 Chem NMR  $^{13}\text{C}$  Estimation of Helminthosporin (Source: ChemDraw Professional)**

As per literature “ $^1\text{H}$ -NMR (400 MHz,  $\text{CDCl}_3$  Me $_2\text{Si}$ ) 6 2-49 (H-3’, 3H, t,  $I_{\text{H}} = 0.8$  Hz,  $I_{\text{C}} = 0.7$  Hz) 7-13 (H-2, 1H, m,  $I_{\text{H}} = 0.8$  Hz,  $I_{\text{C}} = 1.7$  Hz) 7.30 (H-6, H-7, 2H, s) 7.71 (H-4, 1H, m,  $I_{\text{H}} = 1.7$  Hz,  $I_{\text{C}} = 0.7$  Hz) 12.16, 12.34 (20H, 2H, 2s) 13.03 (OH1, 1H, s)” (Engström et al., 1993).

## 2. Experimental NMR

### *Aloe-emodin*

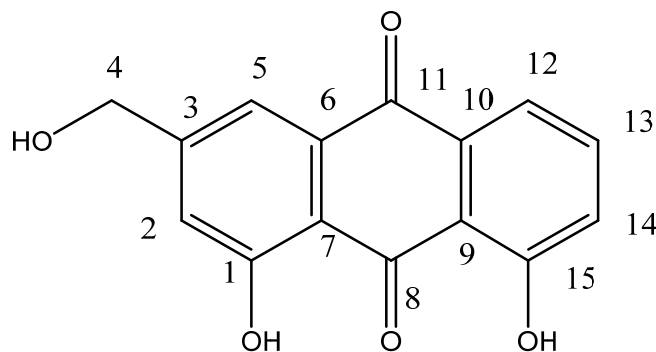

ALOE-EMODIN

| Position | (500MHz)<br>(DMSO- <i>d</i> <sub>6</sub> ) | Peak<br>shape | C13    | ChemDraw<br>prediction<br>(300 MHz)<br>(DMSO) | C13   | Literature review<br>(500MHz)<br>(DMSO- <i>d</i> <sub>6</sub> )<br>(Sanchez et al.,<br>2011) | C13   |
|----------|--------------------------------------------|---------------|--------|-----------------------------------------------|-------|----------------------------------------------------------------------------------------------|-------|
| 1        | --                                         | --            | 161.62 | --                                            | 162.1 | --                                                                                           | 162.3 |
| 2        | 7.29                                       | S             | 120.64 | 7.11                                          | 120.6 | 7.29                                                                                         | 121.4 |
| 3        | --                                         | --            | 153.9  | --                                            | 153.2 | --                                                                                           | 154.4 |
| 4        | 4.62                                       | S             | 62.12  | 4.61                                          | 65.0  | 4.62                                                                                         | 62.7  |
| 5        | 7.69                                       | S             | 117.01 | 7.34                                          | 118.3 | 7.69                                                                                         | 117.8 |
| 6        | --                                         | --            | 133.09 | --                                            | 133.6 | --                                                                                           | 133.9 |
| 7        | --                                         | --            | 114.48 | --                                            | 115.2 | --                                                                                           | 115.2 |
| 8        | --                                         | --            | 191.62 | --                                            | 188.0 | --                                                                                           | 192.4 |
| 9        | --                                         | --            | 115.91 | --                                            | 116.3 | --                                                                                           | 116.7 |
| 10       | --                                         | --            | 133.31 | --                                            | 133.1 | --                                                                                           | 134.1 |
| 11       | --                                         | --            | 181.46 | --                                            | 182.1 | --                                                                                           | 182.2 |
| 12       | 7.71                                       | D             | 119.34 | 7.74                                          | 119.4 | 7.72                                                                                         | 120.0 |
| 13       | 7.80                                       | T             | 137.74 | 7.65                                          | 136.2 | 7.80                                                                                         | 138.0 |
| 14       | 7.38                                       | D             | 124.38 | 7.06                                          | 124.1 | 7.38                                                                                         | 125.1 |
| 15       | --                                         | --            | 161.33 | --                                            | 161.9 | --                                                                                           | 162.0 |

Table S0-1 1H and 13C NMR Chemical Shift of Aloe-emodin

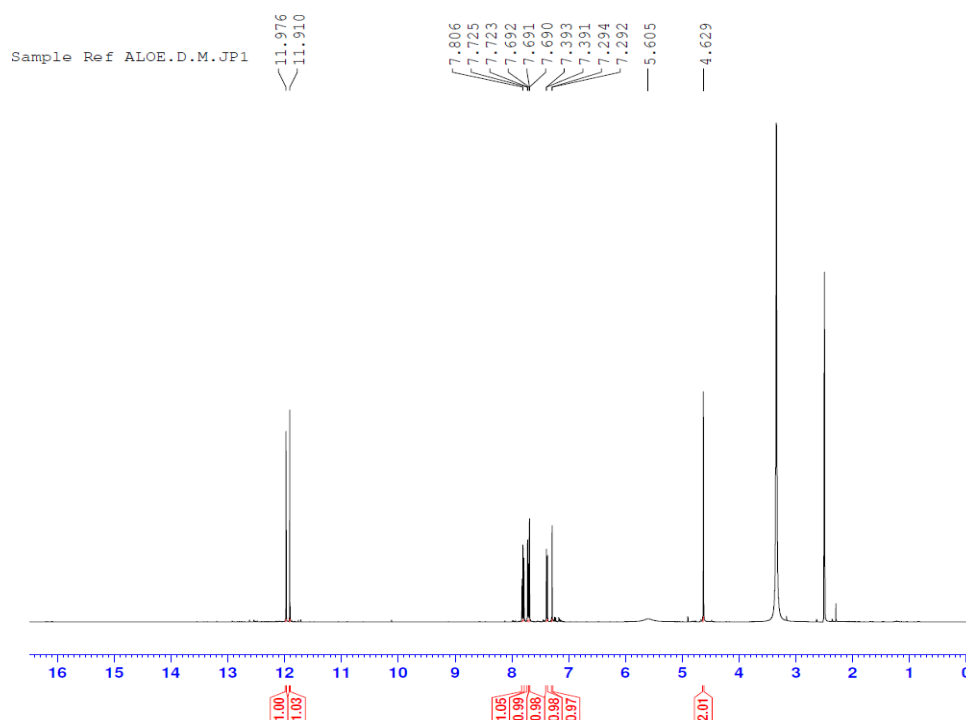Figure S0-1  $^1\text{H}$  NMR Chemical Shift of Aloe-emodin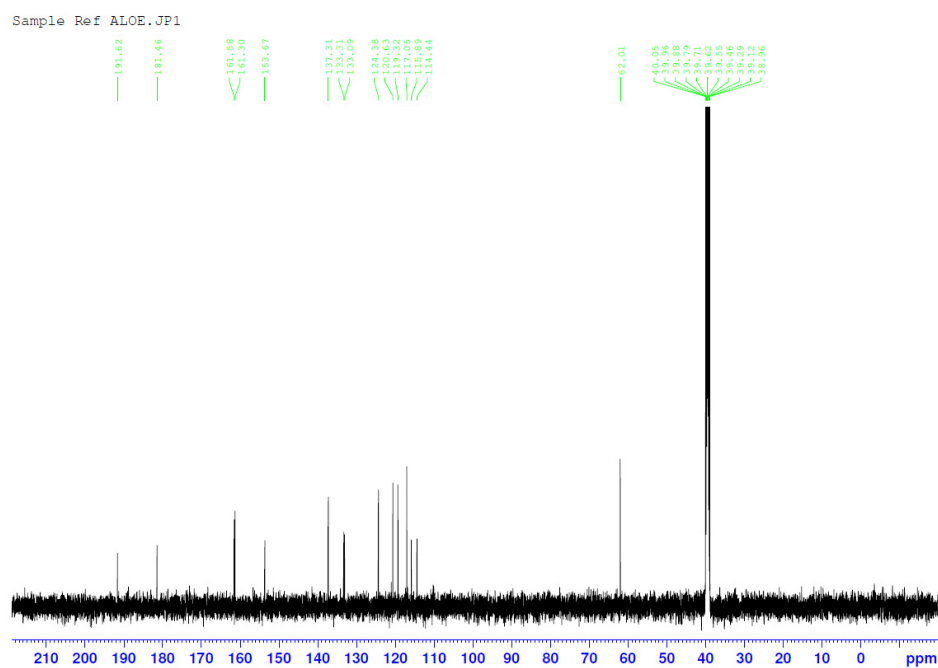Figure S0-2  $^{13}\text{C}$  NMR Chemical Shift of Aloe-emodin

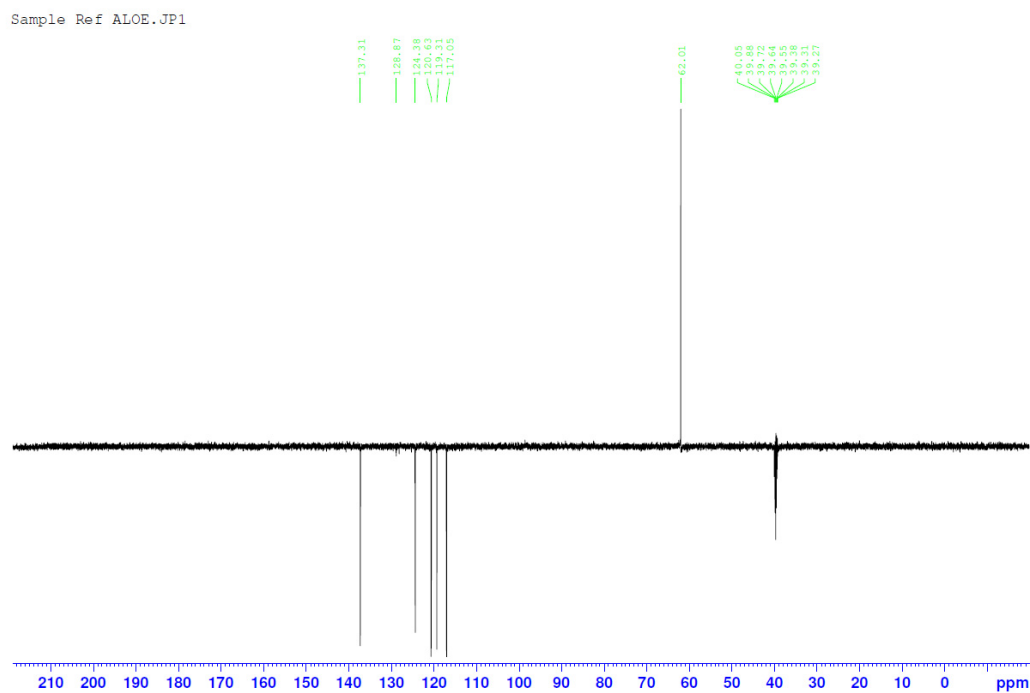

Figure S0-3 Dept 135 of Aloe-emodin

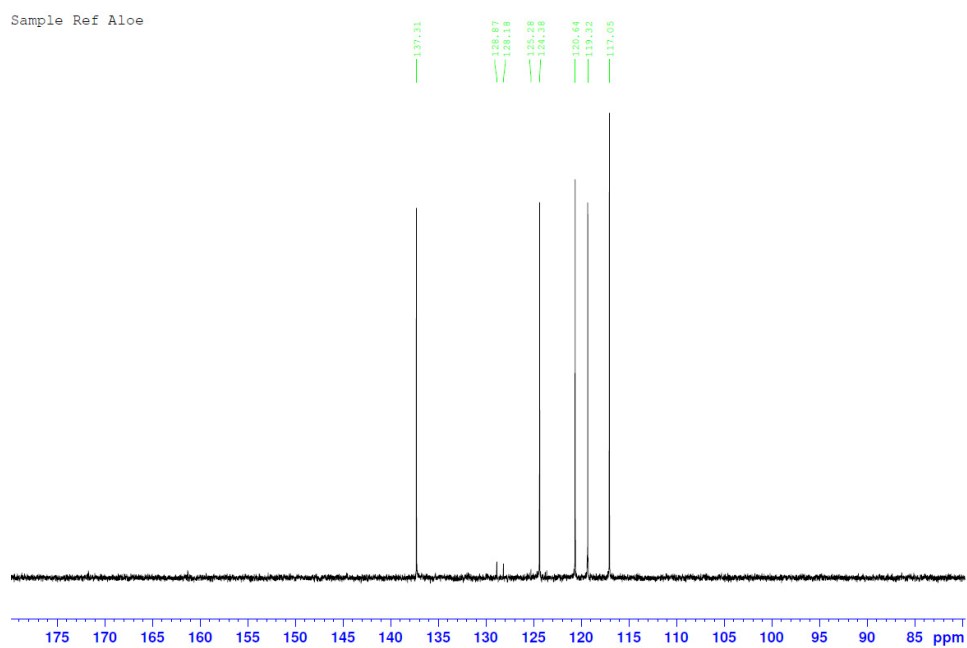

Figure S0-4 Dept 90 of Aloe-emodin

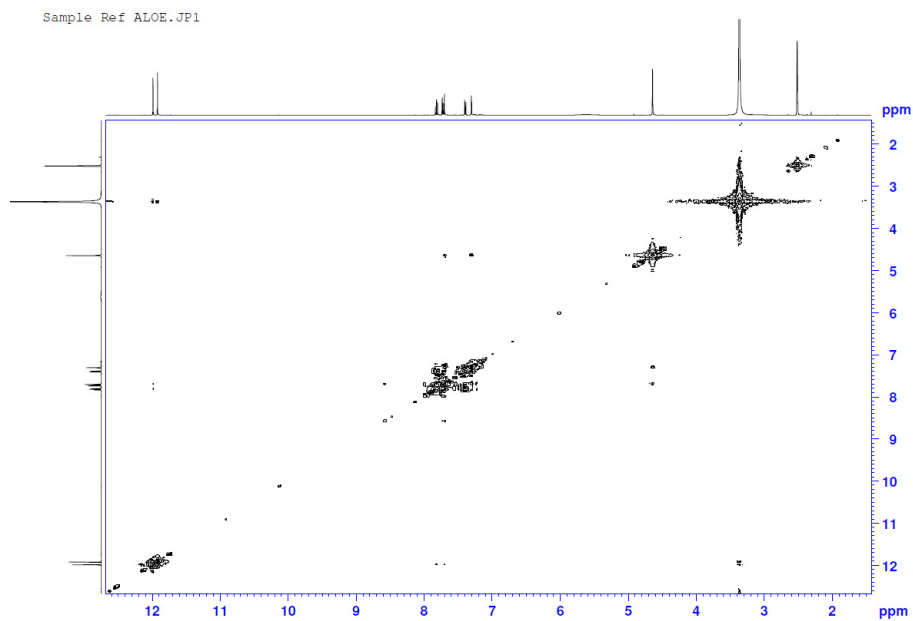

**Figure S0-5** Cosy of Aloe-emodin

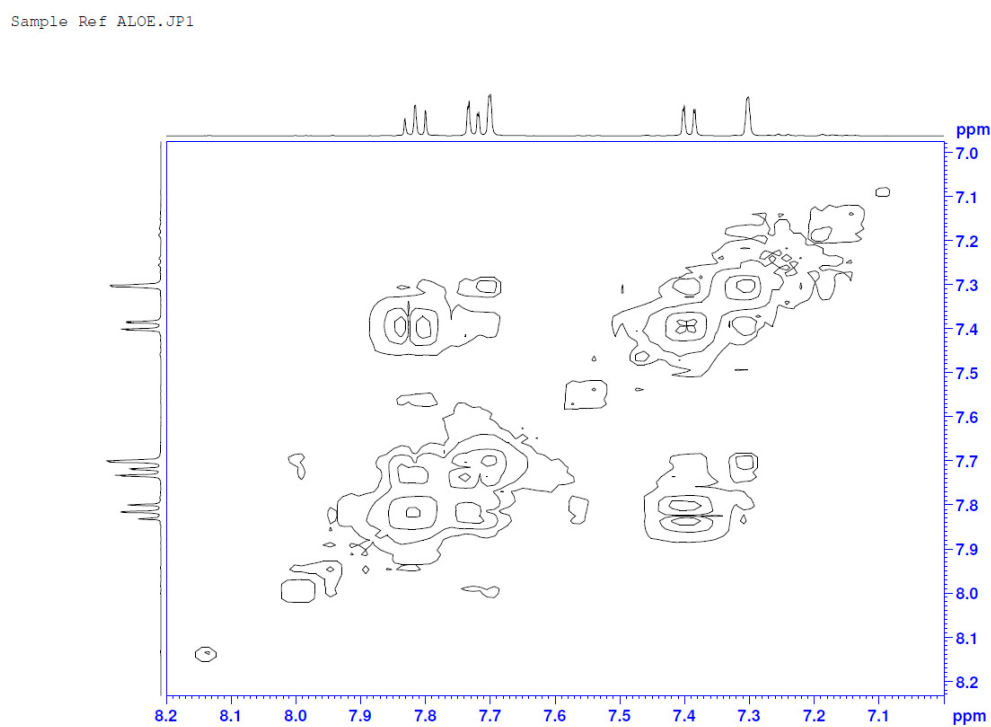

**Figure S0-6** Expand cosy of Aloe-emodin

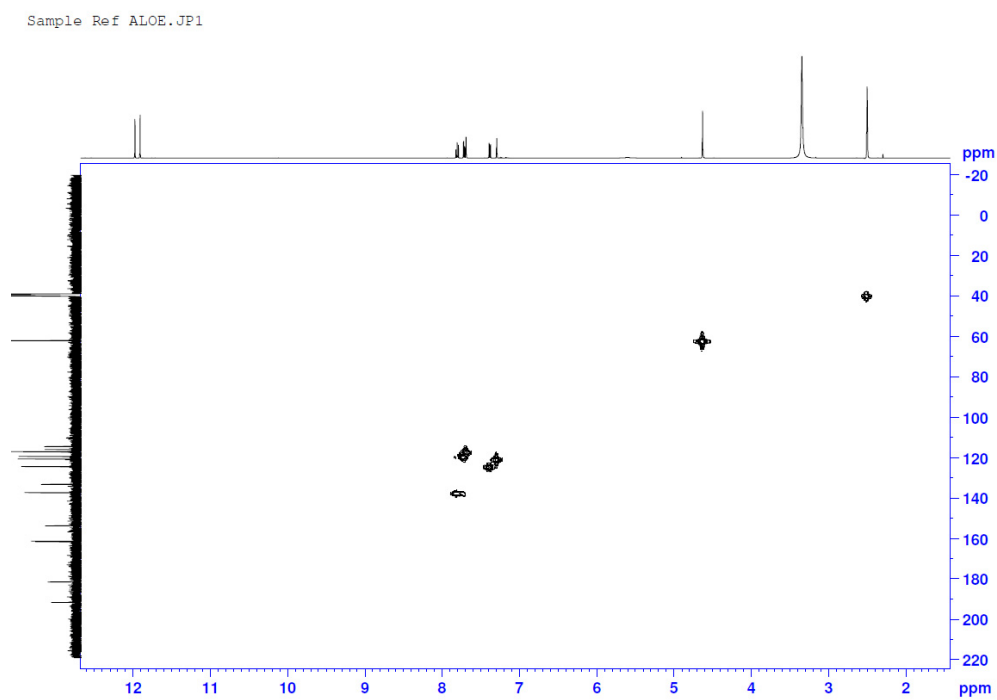

Figure S0-7 HMQC of Aloe-emodin

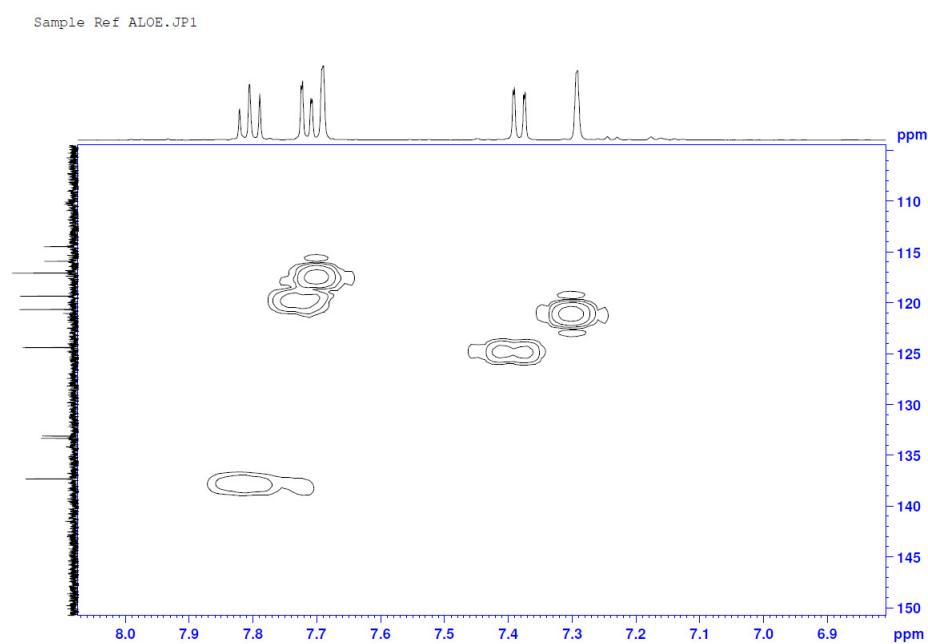

Figure S0-8 Expand HMQC of Aloe-emodin

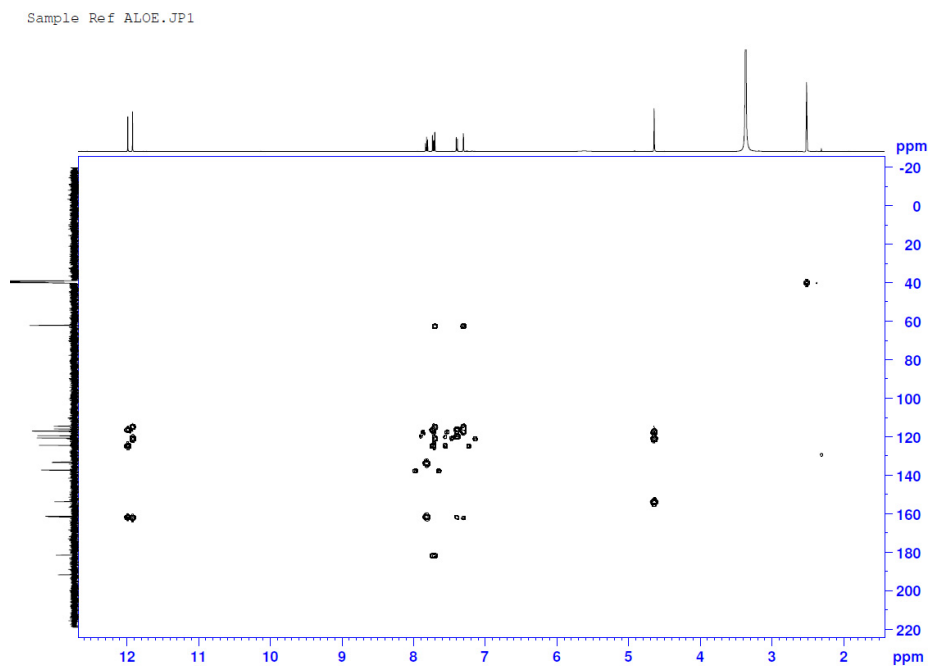

Figure S0-9 HMBC of Aloe-emodin

**Catenarin**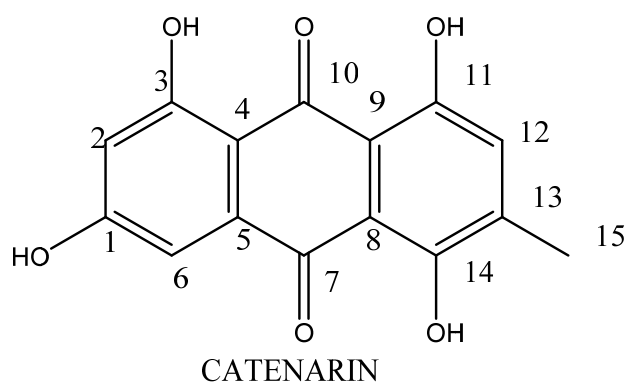

| Position | (500MHz)<br>(DMSO- <i>d</i> <sub>6</sub> ) | Peak<br>shape | C13    | ChemDraw<br>Prediction<br>(300MHz)<br>(DMSO) | C13   | Literature review<br>PPM(400MHz)<br>(DMSO- <i>d</i> <sub>6</sub> ) (Kalidhar,<br>1989) | C13        |
|----------|--------------------------------------------|---------------|--------|----------------------------------------------|-------|----------------------------------------------------------------------------------------|------------|
| 1        | --                                         | --            | 164.43 | --                                           | 163.3 |                                                                                        | NO<br>Data |
| 2        | 6.58                                       | DS            | 108.19 | 6.48                                         | 107.0 | 6.66                                                                                   |            |
| 3        | --                                         | --            | 165.51 | --                                           | 164.5 |                                                                                        |            |
| 4        | --                                         | --            | 108.97 | --                                           | 108.9 |                                                                                        |            |
| 5        | --                                         | --            | 134.70 | --                                           | 136.4 |                                                                                        |            |
| 6        | 7.13                                       | DS            | 108.30 | 6.75                                         | 108.3 | 7.13                                                                                   |            |
| 7        | --                                         | --            | 186.0  | --                                           | 186.4 |                                                                                        |            |
| 8        | --                                         | --            | 110.07 | --                                           | 111.7 |                                                                                        |            |
| 9        | --                                         | --            | 111.43 | --                                           | 111.7 |                                                                                        |            |
| 10       | --                                         | --            | 187.71 | --                                           | 188.0 |                                                                                        |            |
| 11       | --                                         | --            | 156.04 | --                                           | 157.4 |                                                                                        |            |
| 12       | 7.24                                       | S             | 129.09 | 6.82                                         | 129.4 | 7.32                                                                                   |            |

|    |      |    |        |      |       |      |
|----|------|----|--------|------|-------|------|
| 13 | --   | -- | 139.75 | --   | 140.9 |      |
| 14 | --   | -- | 156.74 | --   | 158.0 |      |
| 15 | 2.25 | S  | 15.87  | 2.15 | 15.4  | 2.35 |

Table S0-2 <sup>1</sup>H and <sup>13</sup>C NMR Chemical Shift of catenarin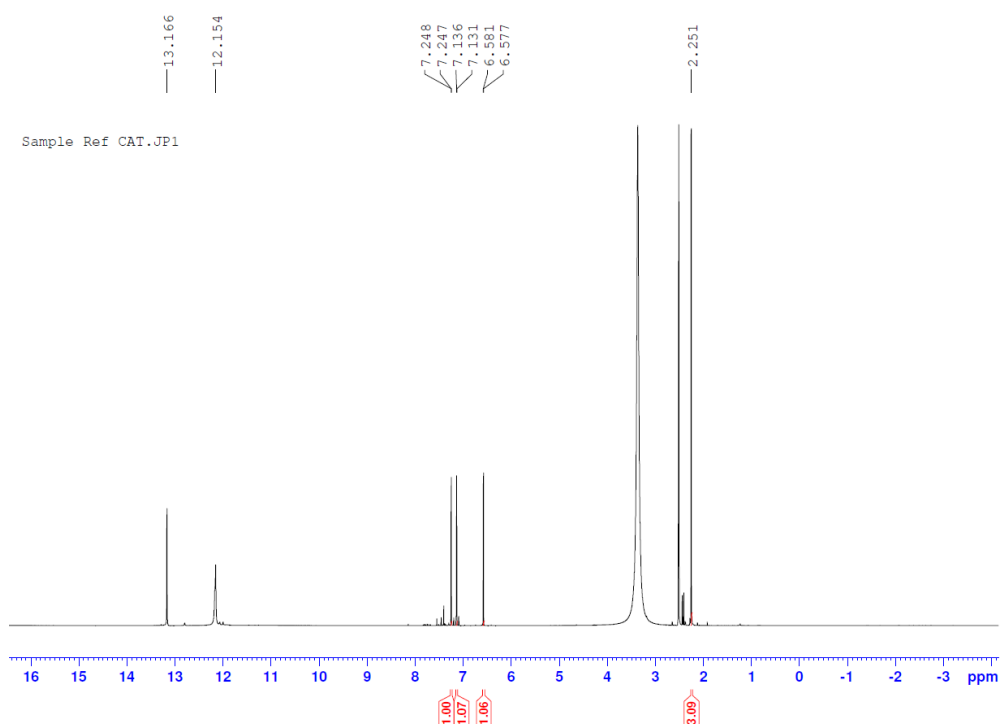Figure S0-10 <sup>1</sup>H NMR Chemical Shift of catenarin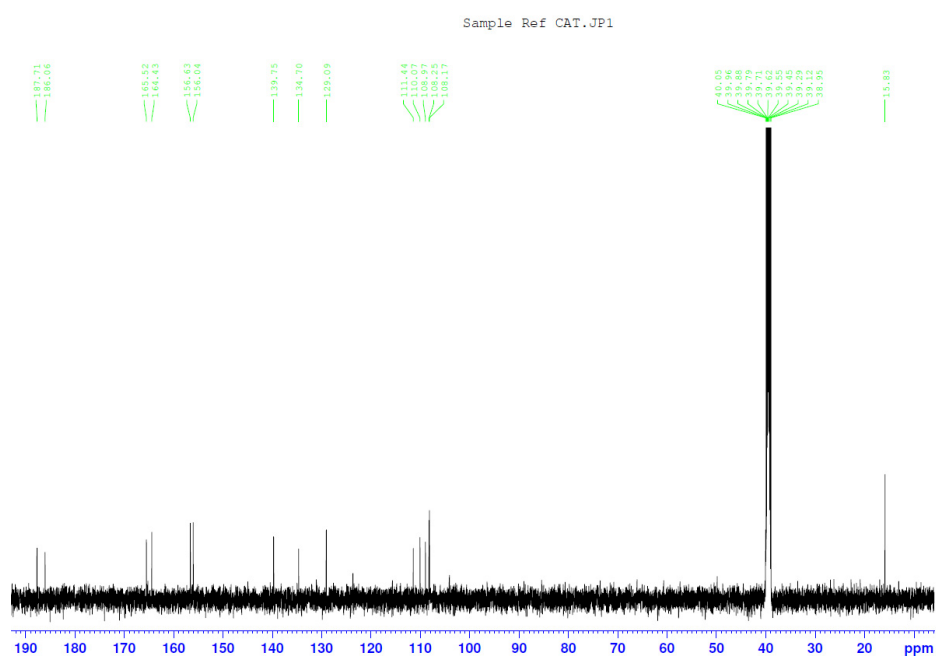Figure S0-11 <sup>13</sup>C NMR Chemical Shift of catenarin



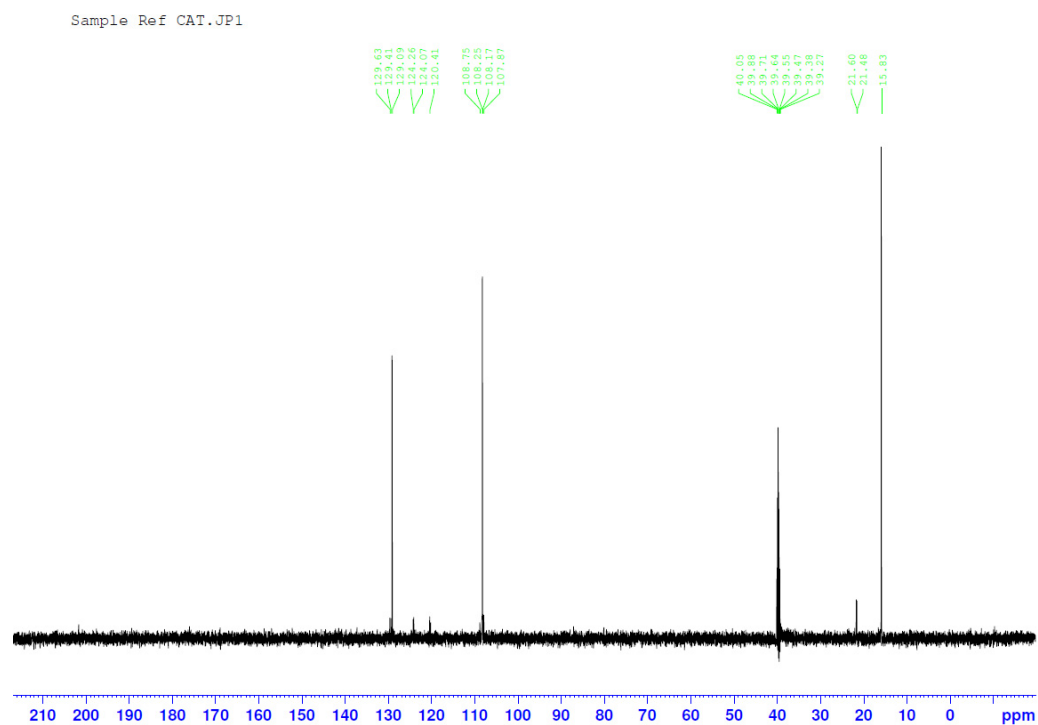

Figure S0-12 Dept 135 of catenarin

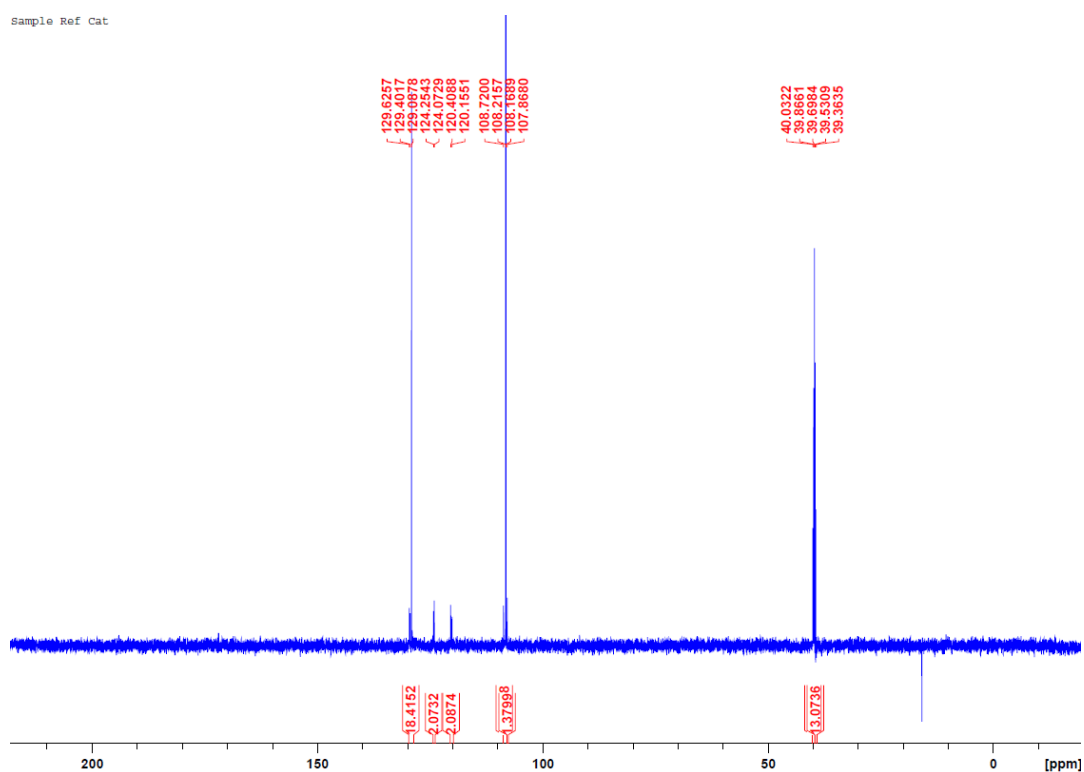

Figure S0-13 Dept 90 of catenarin

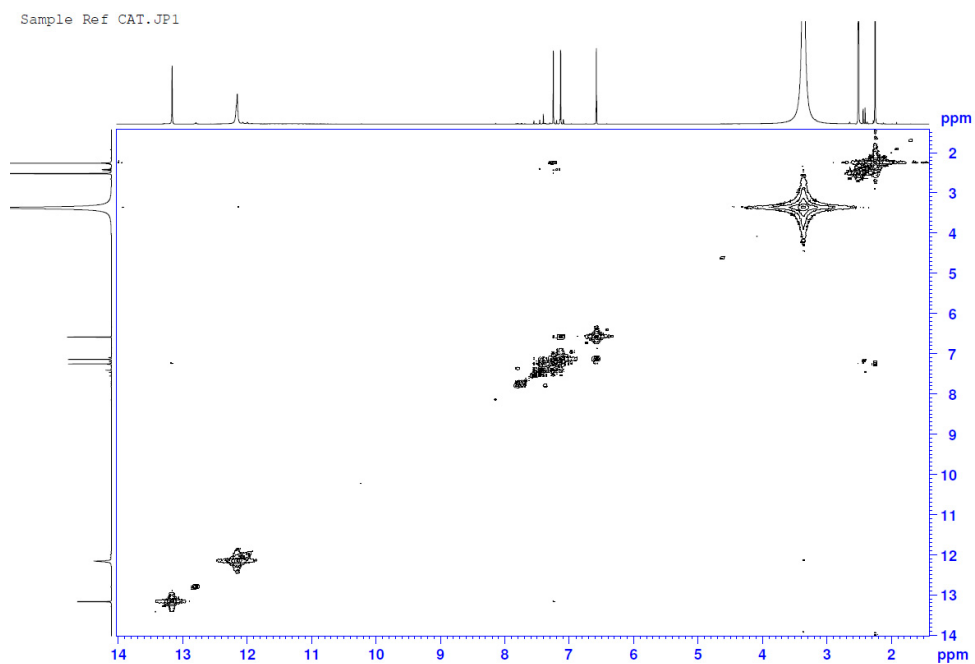

Figure S0-14 Cosy of catenarin

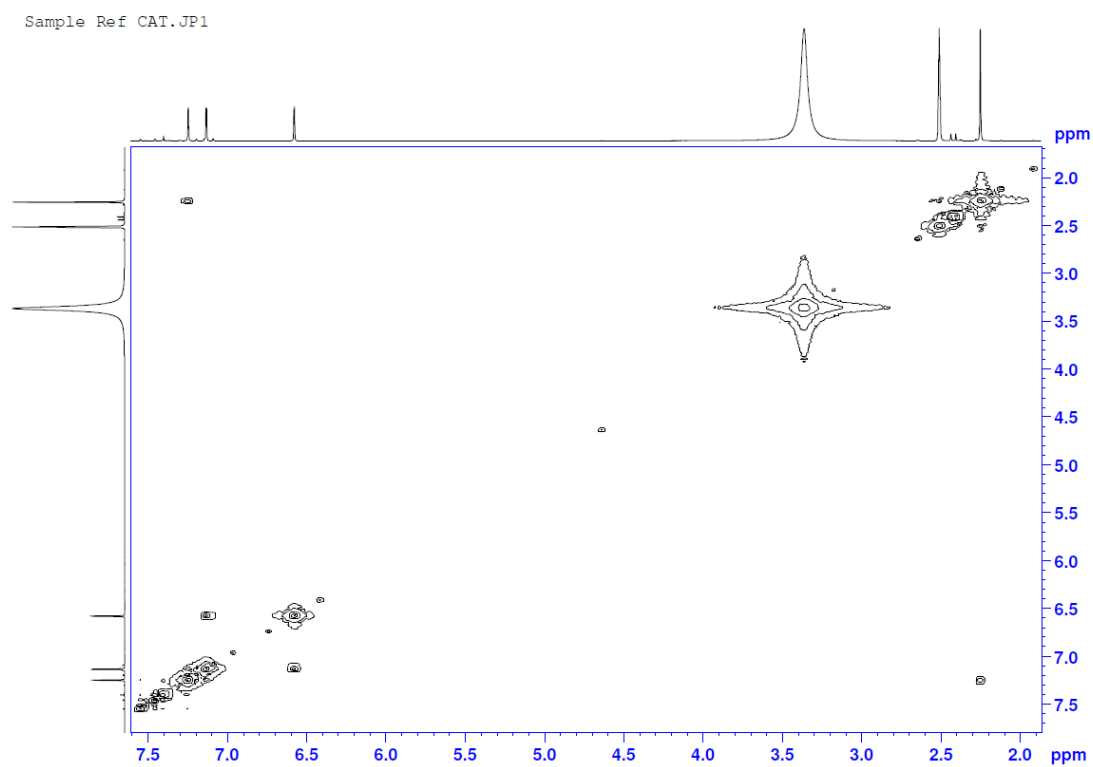

Figure S0-15 Expand cosy of catenarin

Sample Ref CAT.JP1

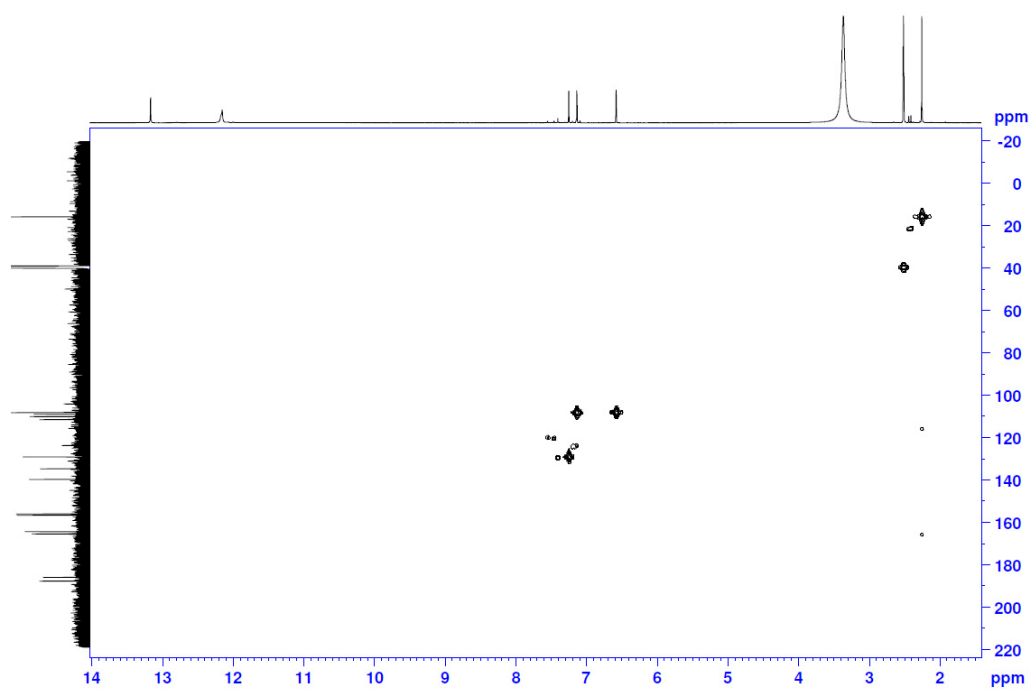

Figure S0-16 HMQC of catenarin

Sample Ref CAT.JP1

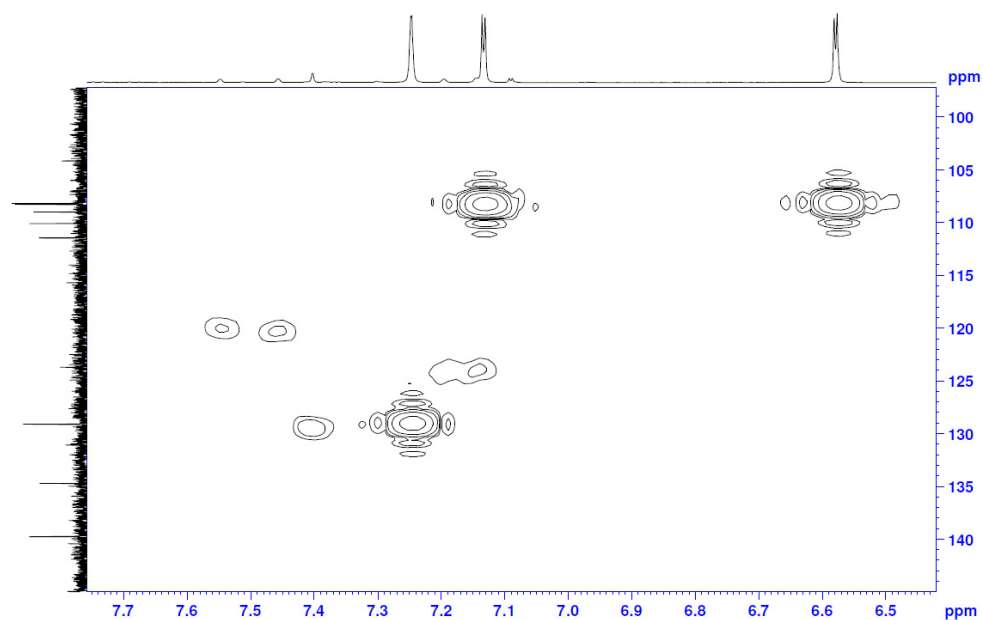

Figure S0-17 Expand HMQC of catenarin

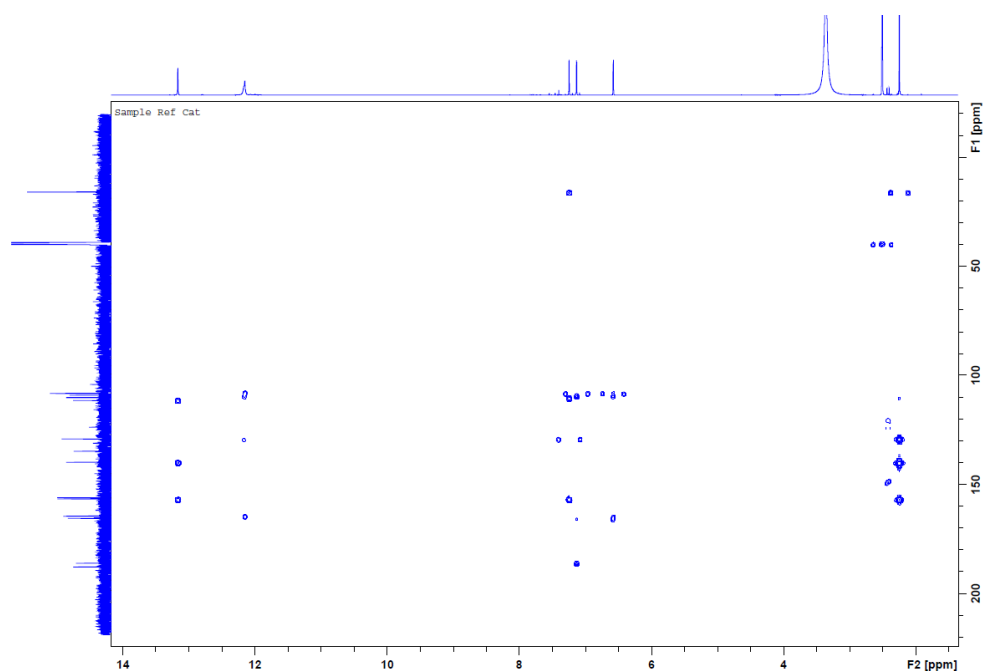

Figure S0-18 HMBC of catenarin

*Chrysazin*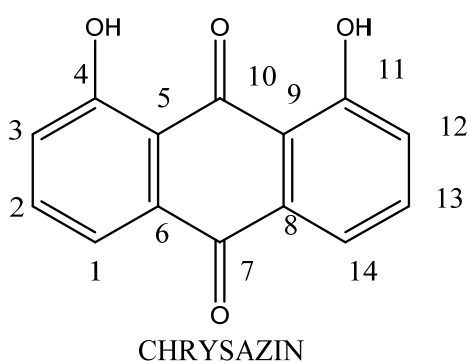

| Position | (500MHz)<br>(DMSO- <i>d</i> <sub>6</sub> ) | Peak<br>shape | C13    | ChemDraw<br>prediction (300MHz)<br>(DMSO) | C13   | Literature review<br>(500MHz) (DMSO- <i>d</i> <sub>6</sub> )<br>(Pullella et al., 2017) | C13   |
|----------|--------------------------------------------|---------------|--------|-------------------------------------------|-------|-----------------------------------------------------------------------------------------|-------|
| 1        | 7.71                                       | DD            | 119.29 | 7.74                                      | 119.4 | 7.70                                                                                    | 120.2 |
| 2        | 7.81                                       | DD            | 137.44 | 7.65                                      | 136.2 | 7.80                                                                                    | 138.0 |
| 3        | 7.39                                       | DD            | 124.39 | 7.06                                      | 124.1 | 7.37                                                                                    | 125.1 |
| 4        | --                                         | --            | 161.30 | --                                        | 161.9 | --                                                                                      | 163.0 |
| 5        | --                                         | --            | 115.94 | --                                        | 116.3 | --                                                                                      | 116.7 |
| 6        | --                                         | --            | 133.28 | --                                        | 133.1 | --                                                                                      | 134.4 |
| 7        | --                                         | --            | 181.38 | --                                        | 182.1 | --                                                                                      | 182.0 |
| 8        | --                                         | --            | 133.28 | --                                        | 133.1 | --                                                                                      | 134.4 |
| 9        | --                                         | --            | 115.94 | --                                        | 116.3 | --                                                                                      | 116.7 |
| 10       | --                                         | --            | 192.01 | --                                        | 188.0 | --                                                                                      | 193.4 |
| 11       | --                                         | --            | 161.30 | --                                        | 161.9 | --                                                                                      | 163.0 |
| 12       | 7.39                                       | DD            | 124.39 | 7.06                                      | 124.1 | 7.37                                                                                    | 125.1 |
| 13       | 7.81                                       | DD            | 137.44 | 7.65                                      | 136.2 | 7.80                                                                                    | 138.0 |
| 14       | 7.71                                       | DD            | 119.29 | 7.74                                      | 119.4 | 7.70                                                                                    | 120.2 |

Table S0-3 1H and 13C NMR Chemical Shift of chrysazin

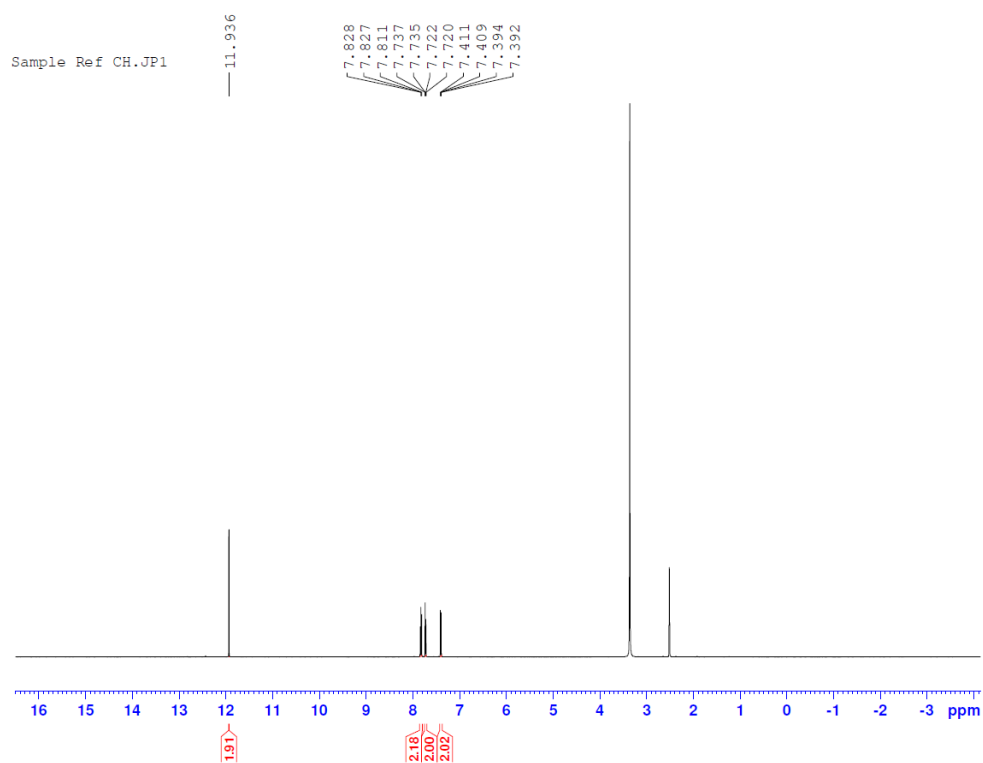Figure S0-19  $^1\text{H}$  NMR Chemical Shift of chrysazin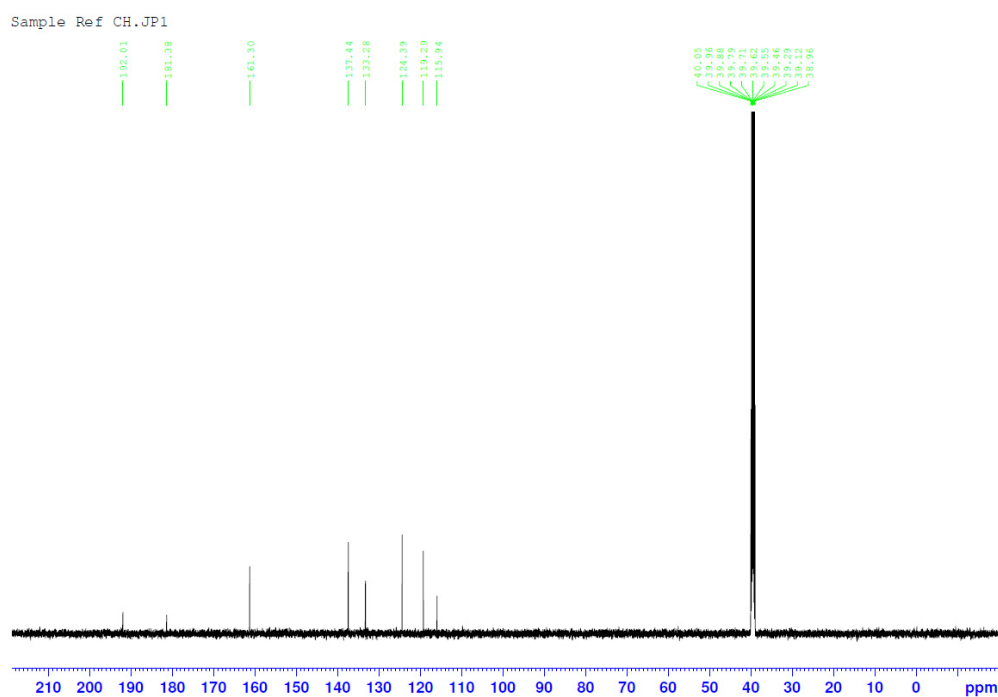Figure S0-20  $^{13}\text{C}$  NMR Chemical Shift of chrysazin

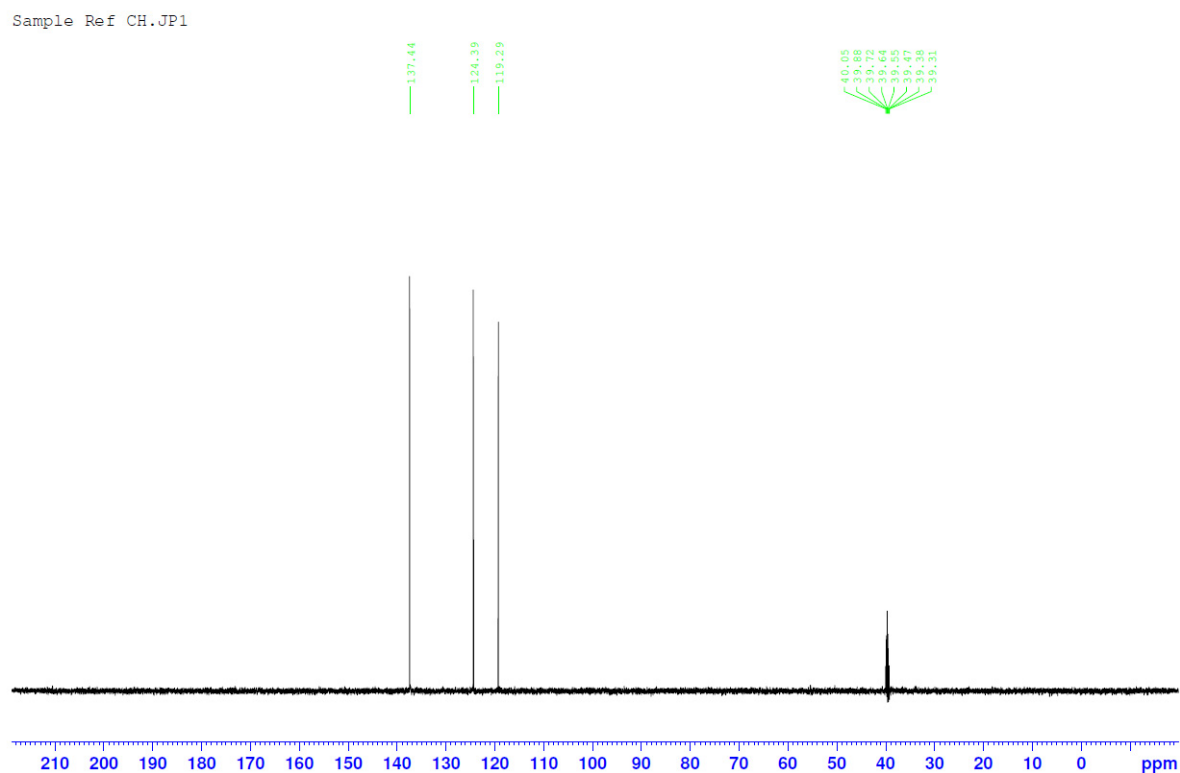

Figure S0-21 Dept 135 of chrysazin

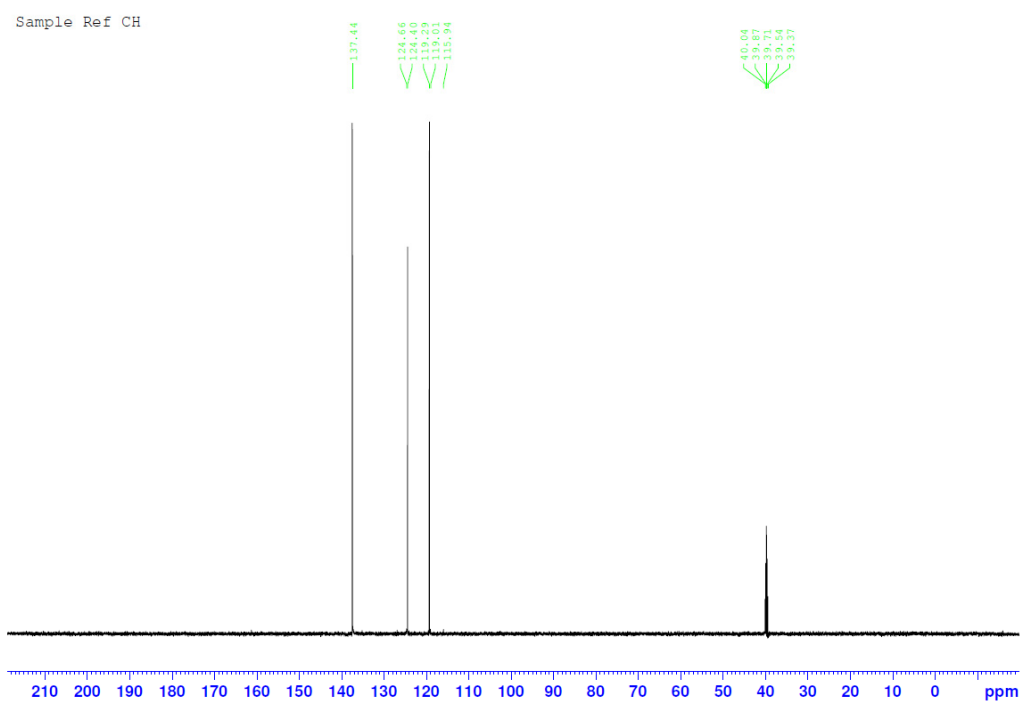

Figure S0-22 Dept 90 of chrysazin

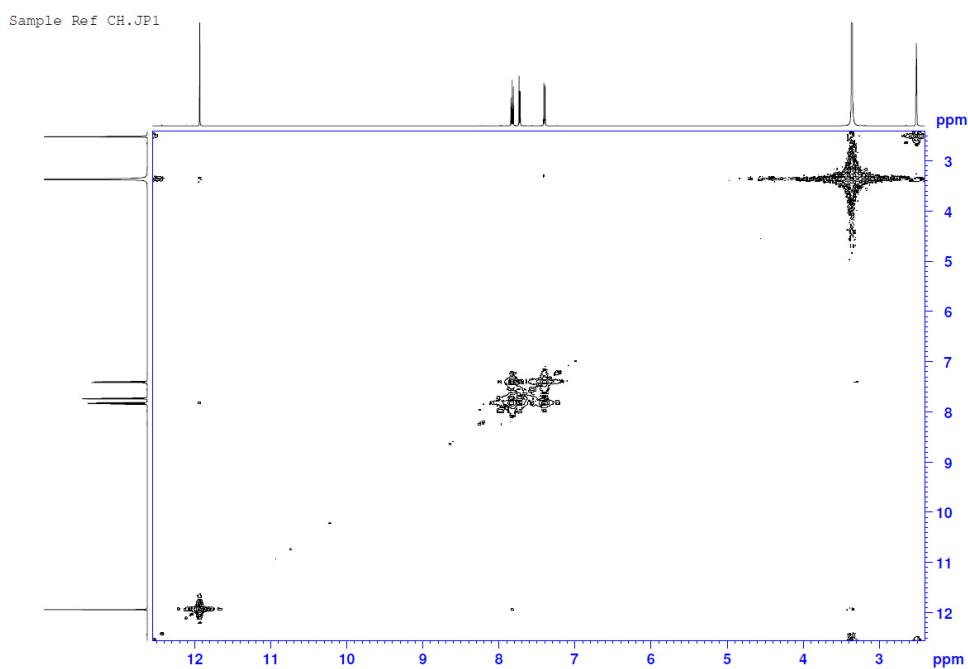

Figure S0-23 Cisy of chrysazin

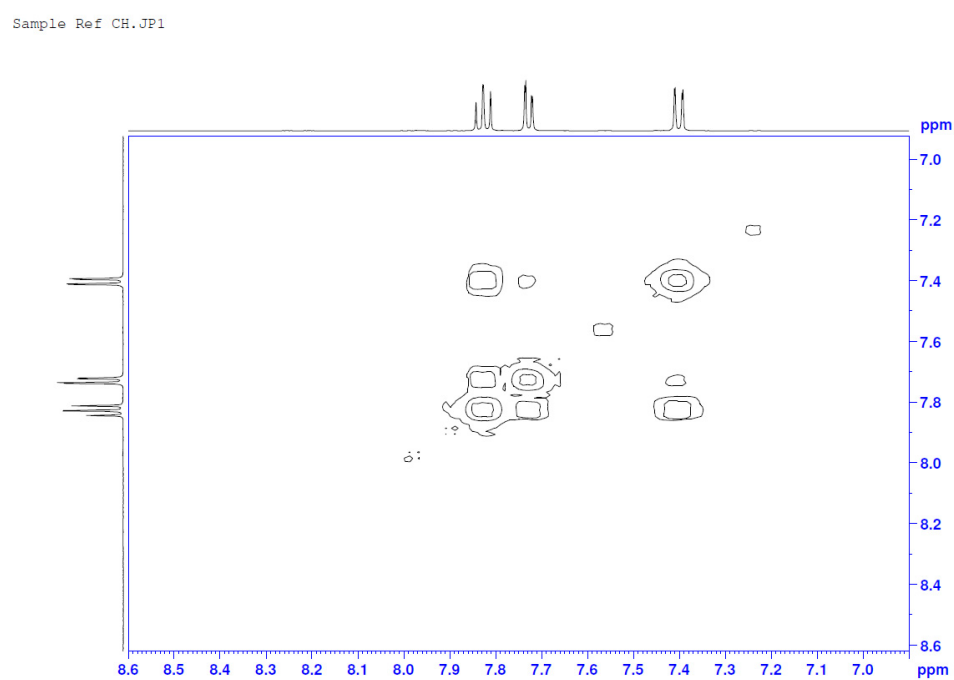

Figure S0-24 Expand cisy of chrysazin

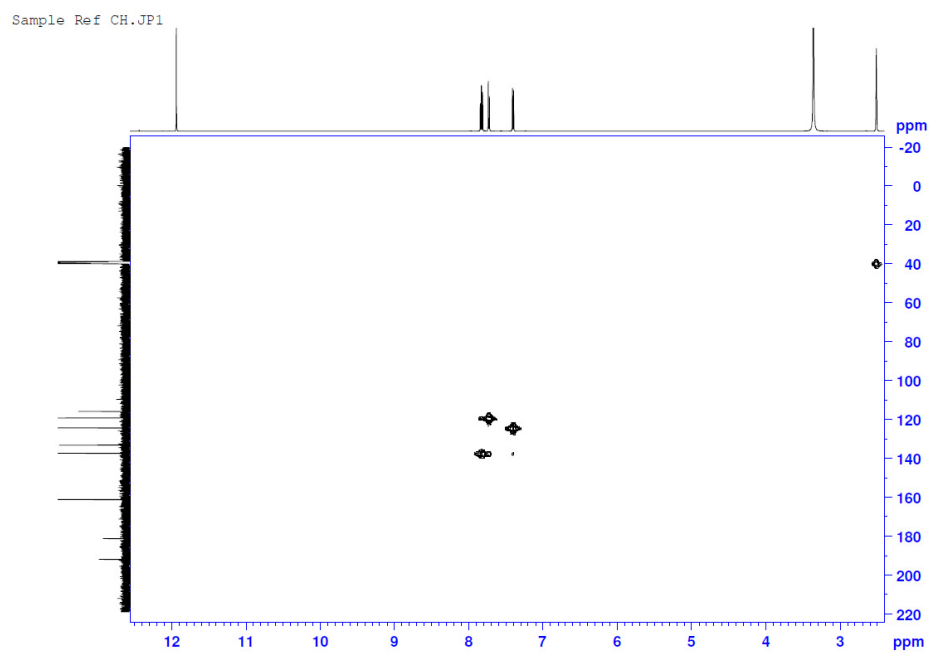

Figure S0-25 HMQC of chrysazin

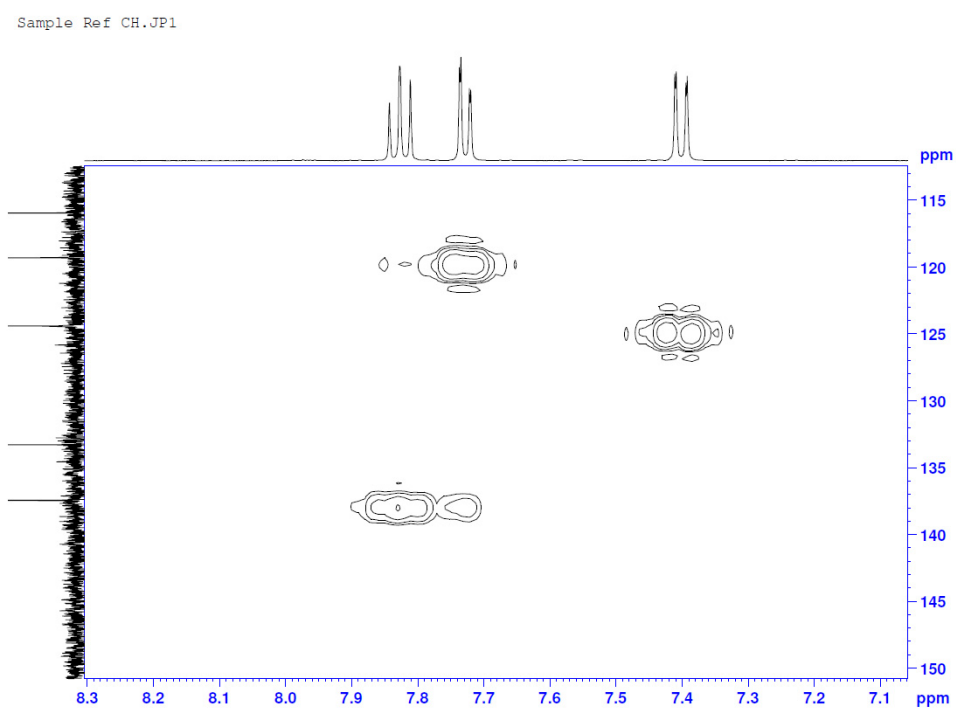

Figure S0-26 Expand HMQC of chrysazin



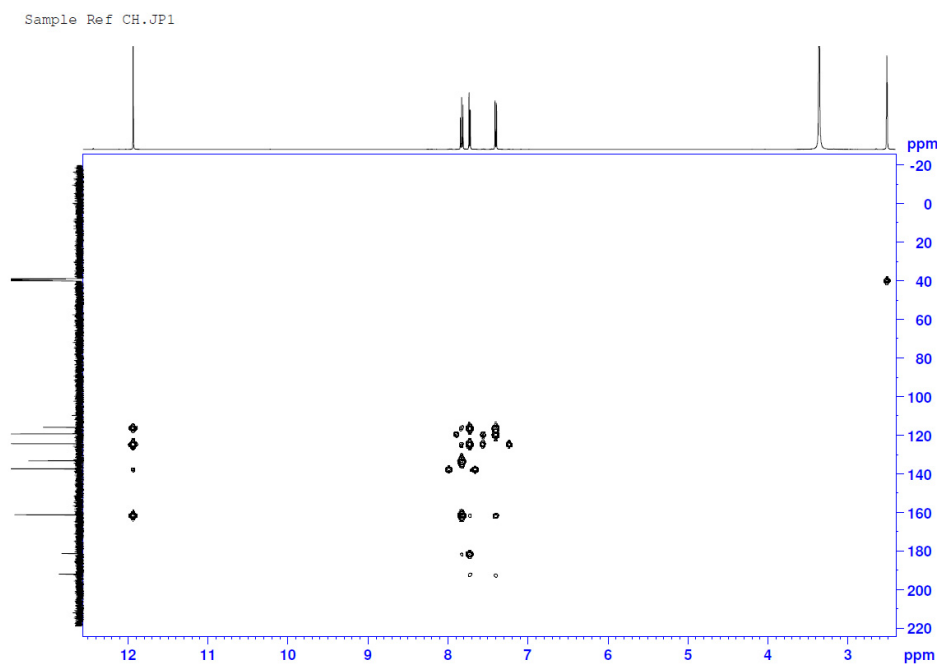

Figure S0-27 HMBC of chrysazin

*Rhein*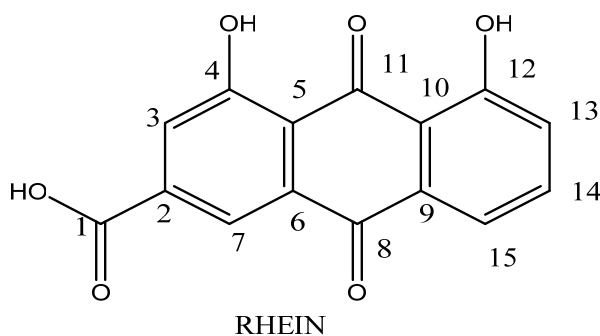

| Position | (500MHz)<br>(DMSO- <i>d</i> 6) | Peak<br>shape | C13    | ChemDraw pre-<br>diction<br>(300MHz)<br>(DMSO) | C13   | Literature review (500MHz)<br>(DMSO- <i>d</i> 6) Danielsen, Ak-<br>snes and Francis, 1992) | C13    |
|----------|--------------------------------|---------------|--------|------------------------------------------------|-------|--------------------------------------------------------------------------------------------|--------|
| 1        | --                             | --            | 165.55 | --                                             | 169.3 | --                                                                                         | 165.52 |
| 2        | --                             | --            | 128.01 | --                                             | 135.0 | --                                                                                         | 138.20 |
| 3        | 7.76                           | DS            | 123.93 | 7.81                                           | 124.5 | 7.77                                                                                       | 124.21 |
| 4        | --                             | --            | 161.10 | --                                             | 160.1 | --                                                                                         | 161.51 |
| 5        | --                             | --            | 119.6  | --                                             | 121.5 | --                                                                                         | 118.48 |
| 6        | --                             | --            | 132.95 | --                                             | 131.5 | --                                                                                         | 133.61 |
| 7        | 8.13                           | DS            | 118.03 | 7.56                                           | 120.6 | 8.14                                                                                       | 119.05 |
| 8        | --                             | --            | 181.7  | --                                             | 182.1 | --                                                                                         | 181.25 |
| 9        | --                             | --            | 134.8  | --                                             | 133.1 | --                                                                                         | 133.41 |

|    |      |    |        |      |       |      |        |
|----|------|----|--------|------|-------|------|--------|
| 10 | --   | -- | 120.63 | --   | 116.3 | --   | 116.33 |
| 11 | --   | -- | 187.38 | --   | 188.0 | --   | 191.49 |
| 12 | --   | -- | 158.31 | --   | 161.9 | --   | 161.27 |
| 13 | 7.74 | DD | 122.42 | 7.06 | 124.1 | 7.41 | 124.64 |
| 14 | 7.91 | -- | 136.26 | 7.65 | 136.2 | 7.84 | 137.63 |
| 15 | 7.90 | -- | 120.57 | 7.74 | 119.4 | 7.75 | 119.48 |

Table S0-4 1H and 13C NMR Chemical Shift of rhein

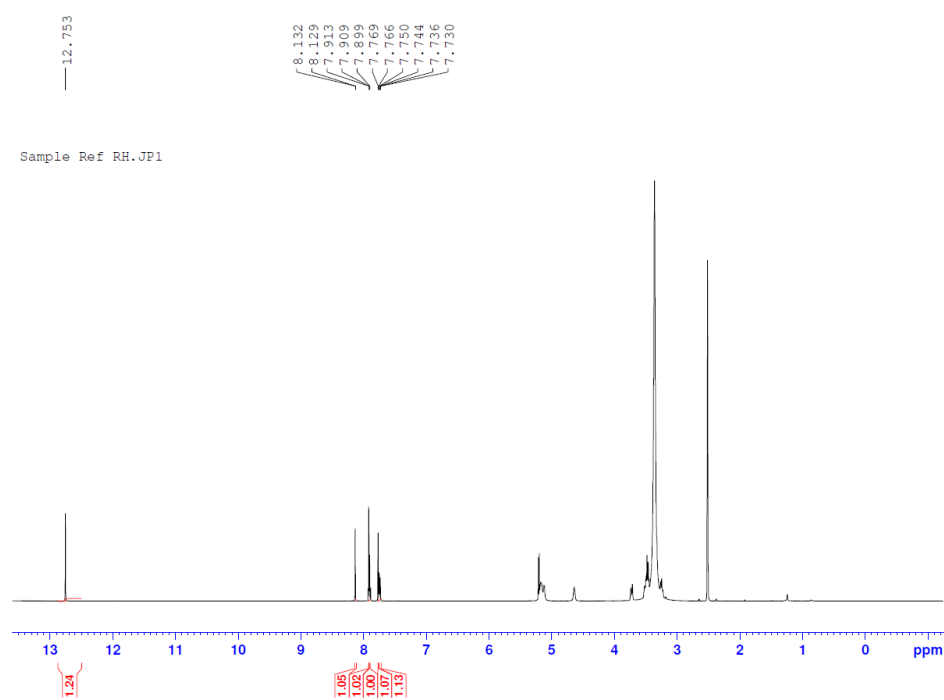

Figure S0-28 1H NMR Chemical Shift of rhein

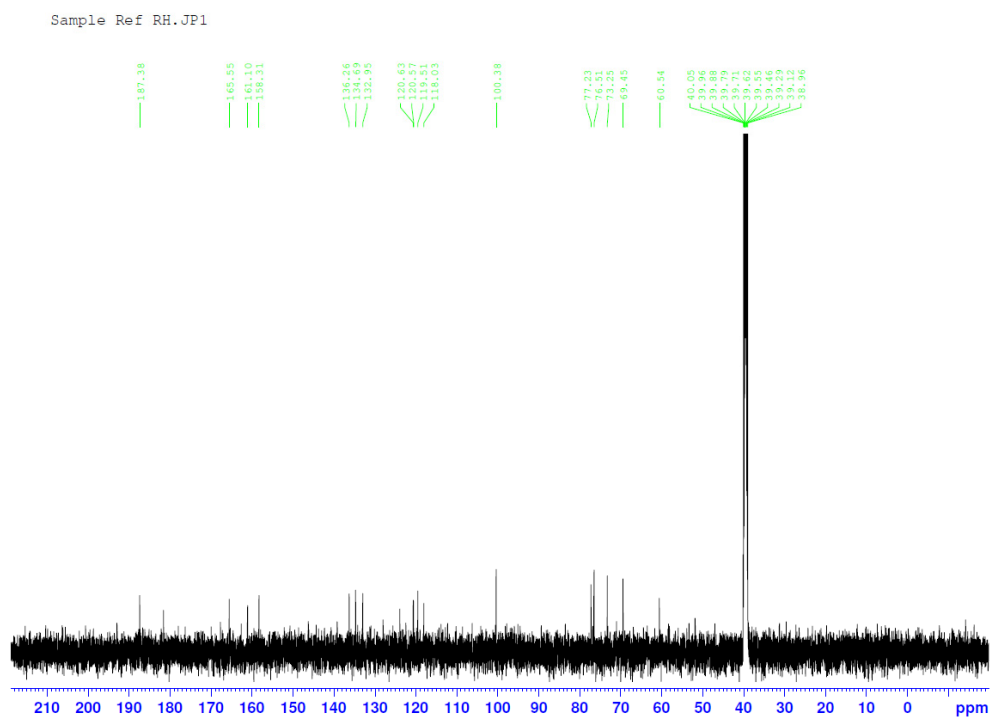

Figure S0-29 <sup>13</sup>C NMR Chemical Shift of rhein

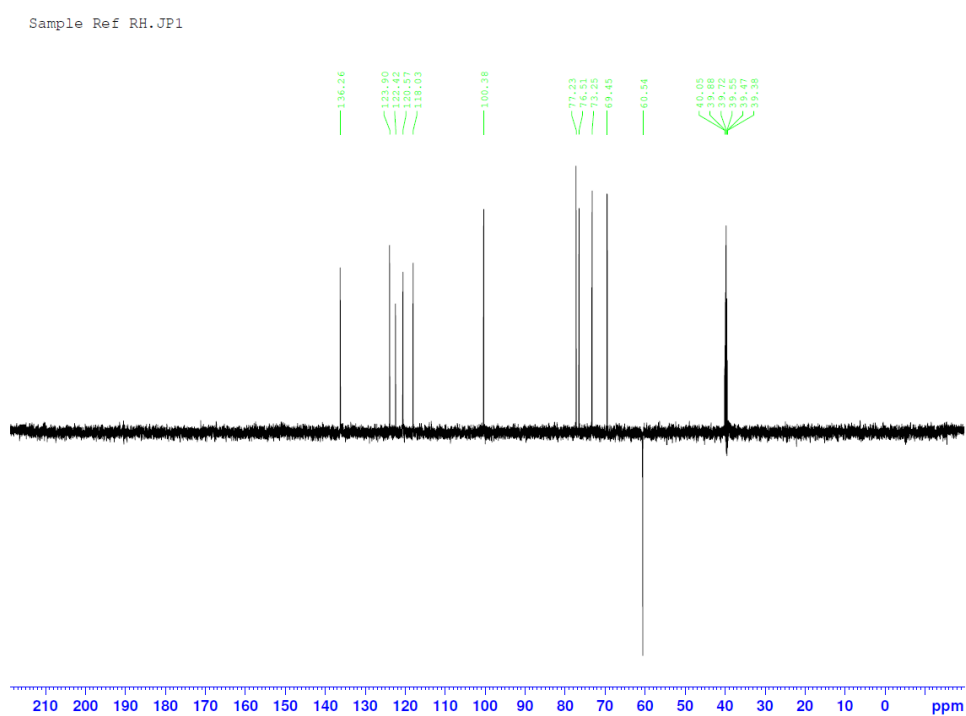

Figure S0-30 DEPT 135 of rhein

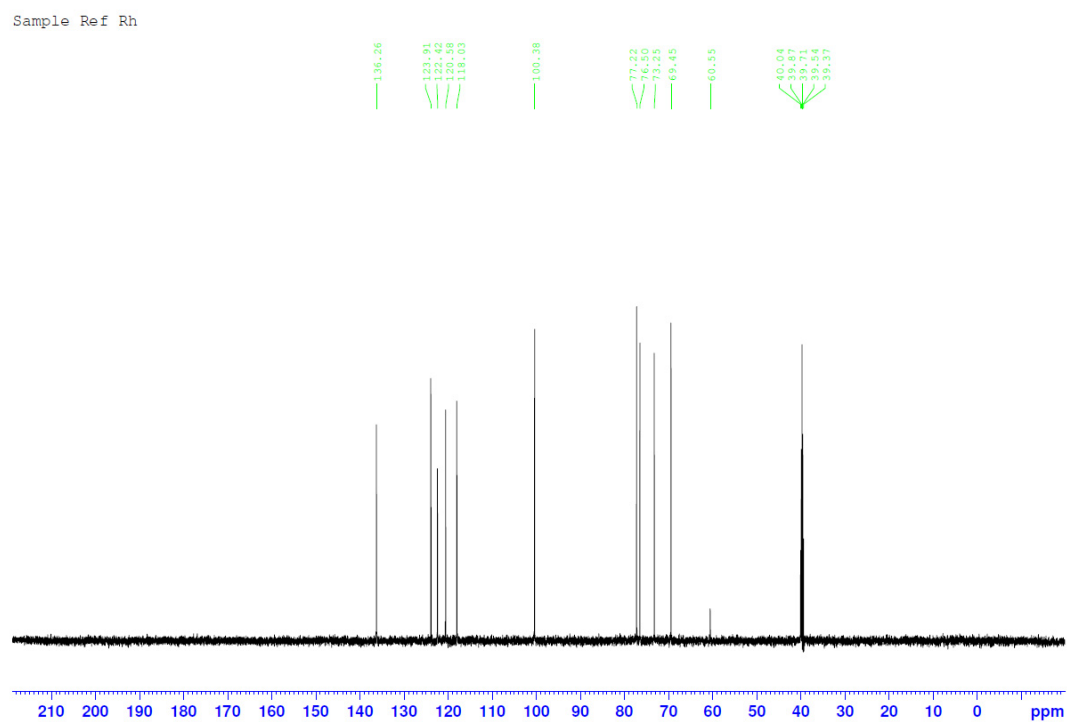

Figure S0-31 Dept 90 of rhein

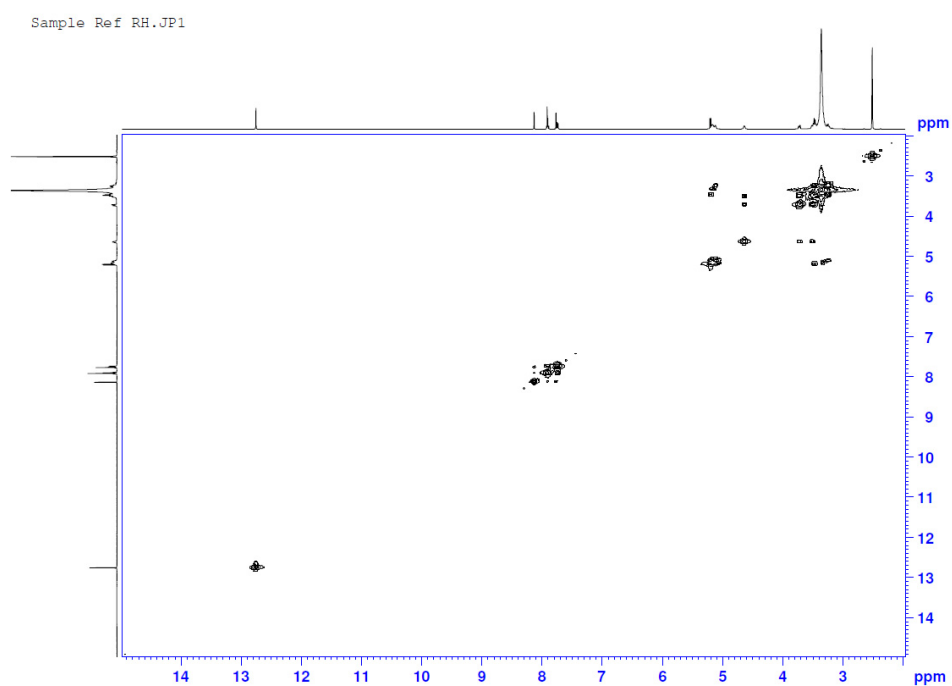

Figure S0-32 Cosy of rhein

Sample Ref RH.JP1

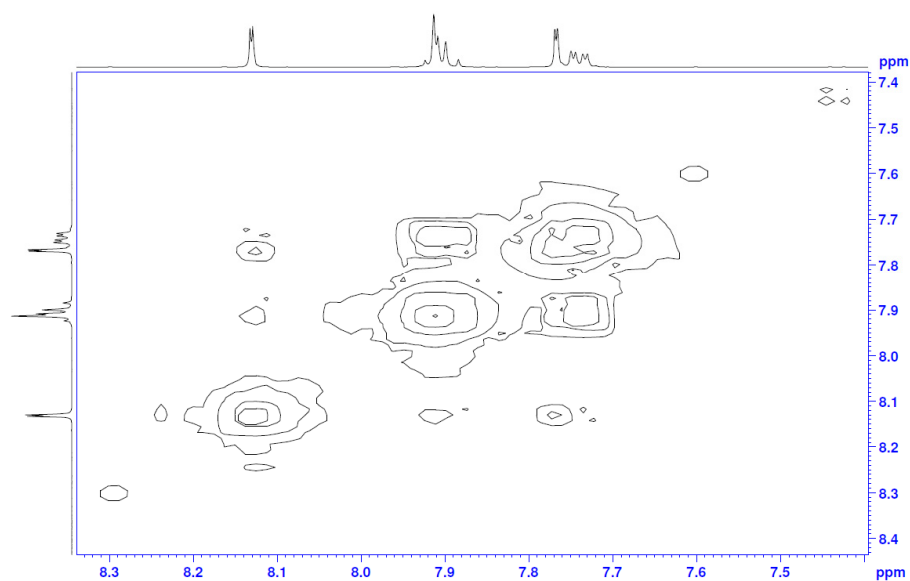

Figure S0-33 Expand cosy of rhein

Sample Ref RH.JP1

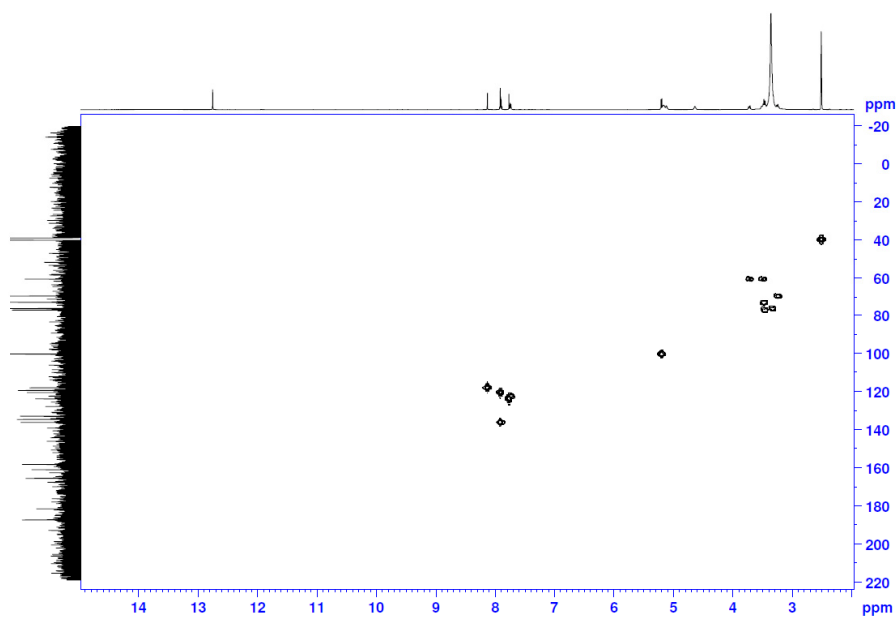

Figure S0-34 HMQC of rhein

Sample Ref RH.JP1

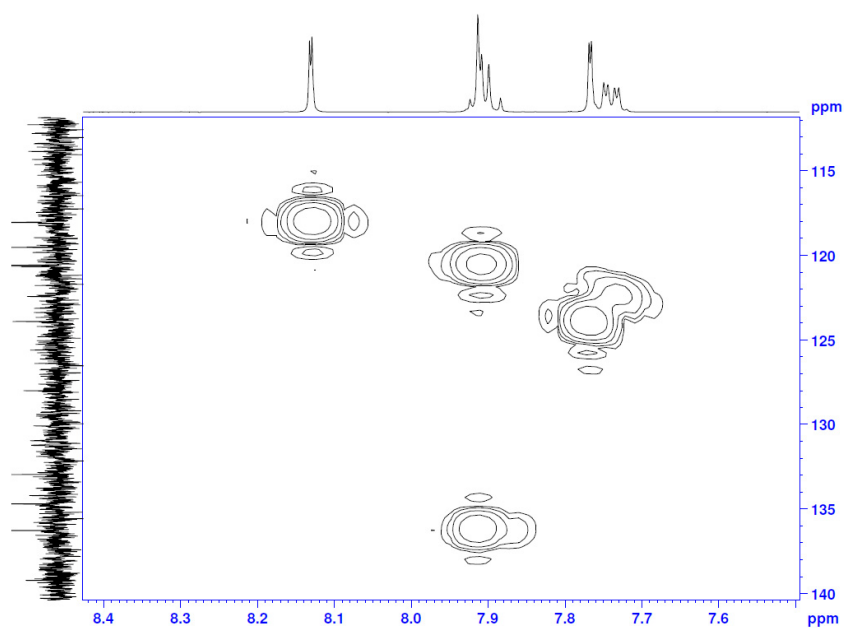

Figure S0-35 Expand HMQC of rhein

Sample Ref RH.JP1

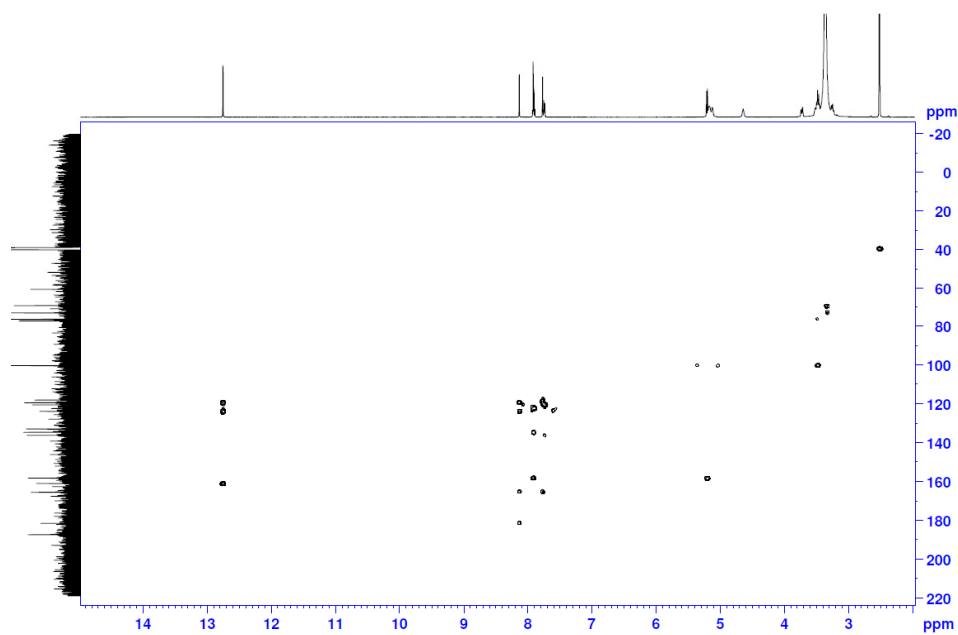

Figure S0-36 HMBC of rhein

**Helminthosporin**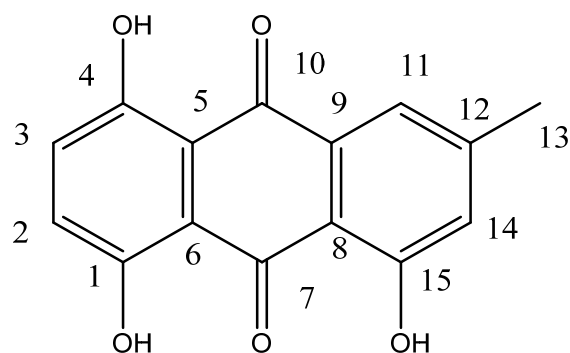**HELMINTHOSPORIN**

| Position | (500MHz)<br>(DMSO-<br><i>d</i> 6) | Peak<br>shape | C13    | ChemDraw<br>prediction<br>(300MHz)<br>(DMSO) | C13   | Literature review<br>(500MHz)<br>(DMSO- <i>d</i> 6) (Eng-<br>ström et al., 1993) | C13   |
|----------|-----------------------------------|---------------|--------|----------------------------------------------|-------|----------------------------------------------------------------------------------|-------|
| 1        | --                                | --            | 157.06 | --                                           | 157.3 | --                                                                               | 158.2 |
| 2        | 7.44                              | S             | 129.43 | 7.37                                         | 129.5 | 7.44                                                                             | 129.5 |
| 3        | 7.44                              | S             | 129.69 | 7.37                                         | 129.5 | 7.44                                                                             | 129.6 |
| 4        | --                                | --            | 156.39 | --                                           | 157.3 | --                                                                               | 157.6 |
| 5        | --                                | --            | 112.71 | --                                           | 114.7 | --                                                                               | 112.8 |
| 6        | --                                | --            | 112.55 | --                                           | 114.7 | --                                                                               | 112.5 |
| 7        | --                                | --            | 189.94 | --                                           | 188.0 | --                                                                               | 190.6 |
| 8        | --                                | --            | 113.84 | --                                           | 113.3 | --                                                                               | 114.0 |
| 9        | --                                | --            | 132.88 | -                                            | 133.3 | --                                                                               | 133.2 |
| 10       | --                                | --            | 186.36 | --                                           | 185.5 | --                                                                               | 186.6 |
| 11       | 7.64                              | S             | 120.29 | 7.22                                         | 120.2 | 7.65                                                                             | 120.8 |
| 12       | --                                | --            | 149.14 | --                                           | 147.6 | --                                                                               | 149.1 |
| 13       | 2.46                              | S             | 21.63  | 2.36                                         | 21.6  | 2.45                                                                             | 22.3  |
| 14       | 7.26                              | S             | 124.3  | 6.66                                         | 122.7 | 7.26                                                                             | 124.6 |
| 15       | --                                | --            | 161.68 | --                                           | 161.8 | --                                                                               | 162.8 |

**Table S0-5 1H and 13C NMR Chemical Shift of helminthosporin**

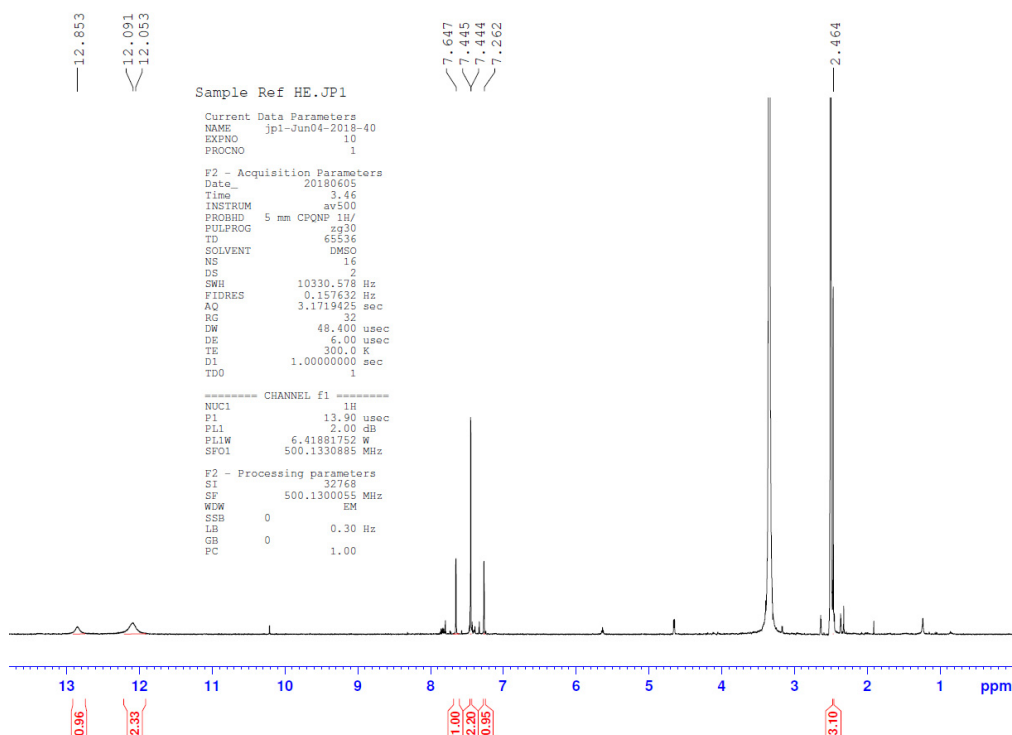

Figure S0-37 1H NMR Chemical Shift of helminthosporin

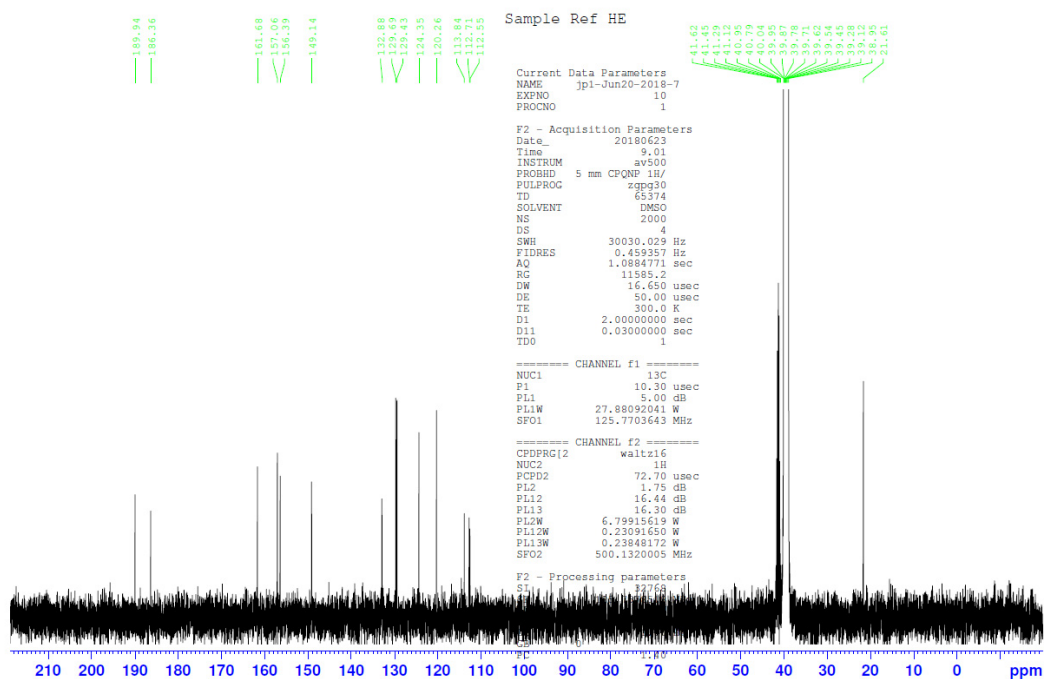

Figure S0-38 13C NMR Chemical Shift of helminthosporin



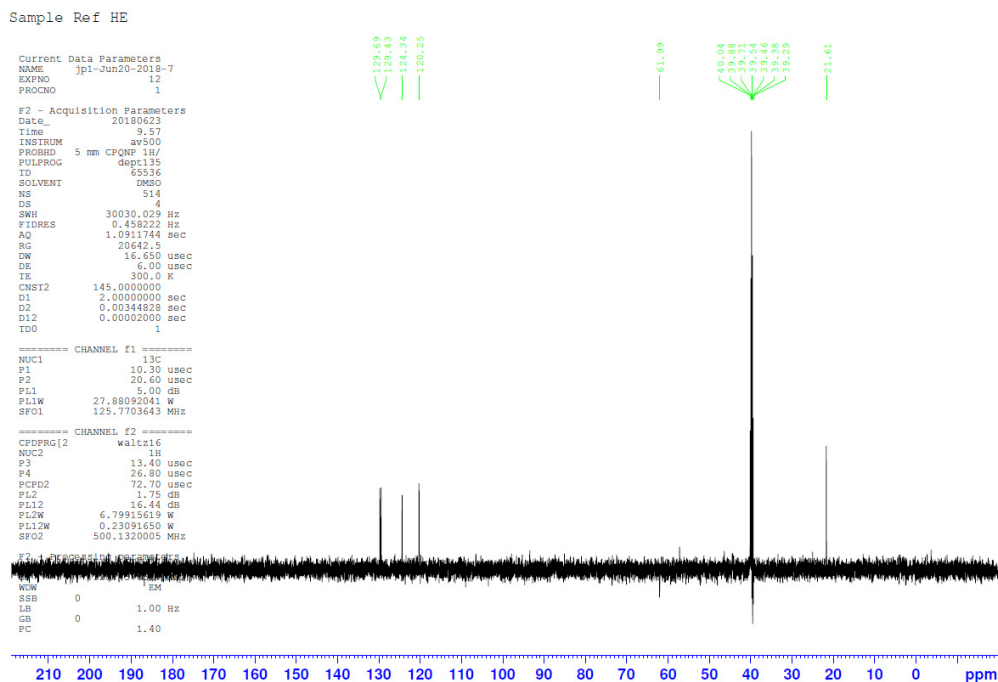

Figure S0-39 Dept 135 of helminthosporin

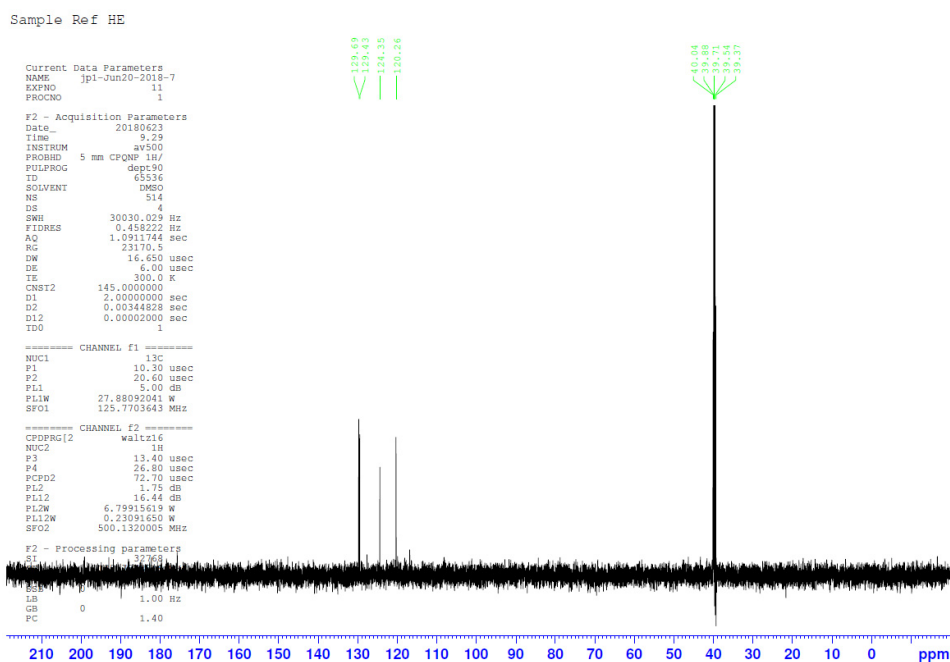

Figure S0-40 Dept 90 of helminthosporin

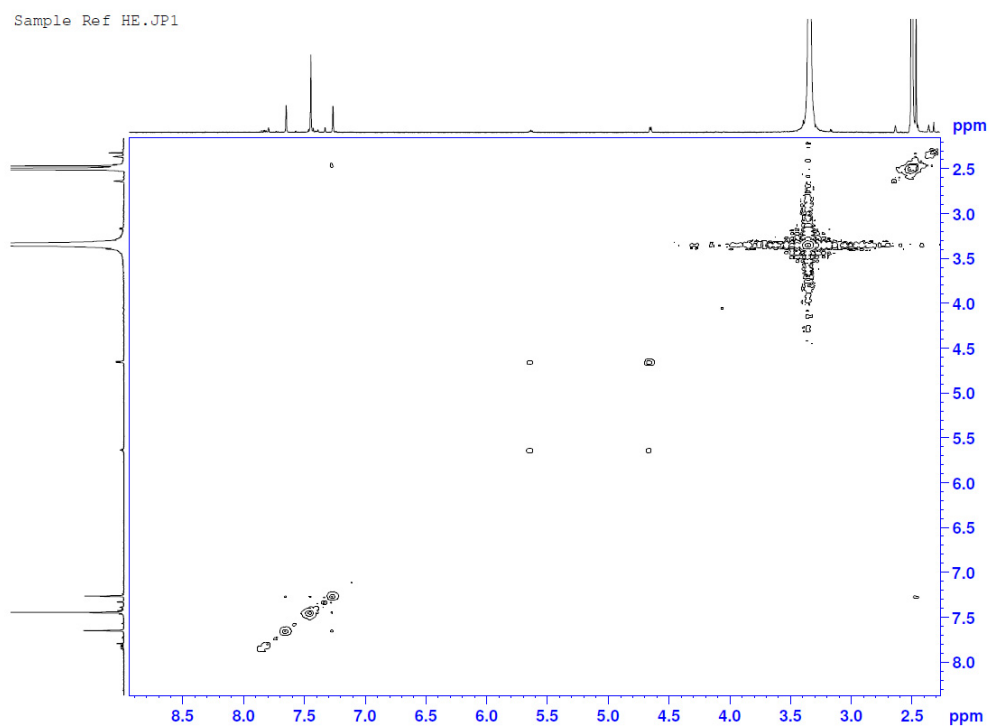

**Figure S0-41** Cosy of helminthosporin

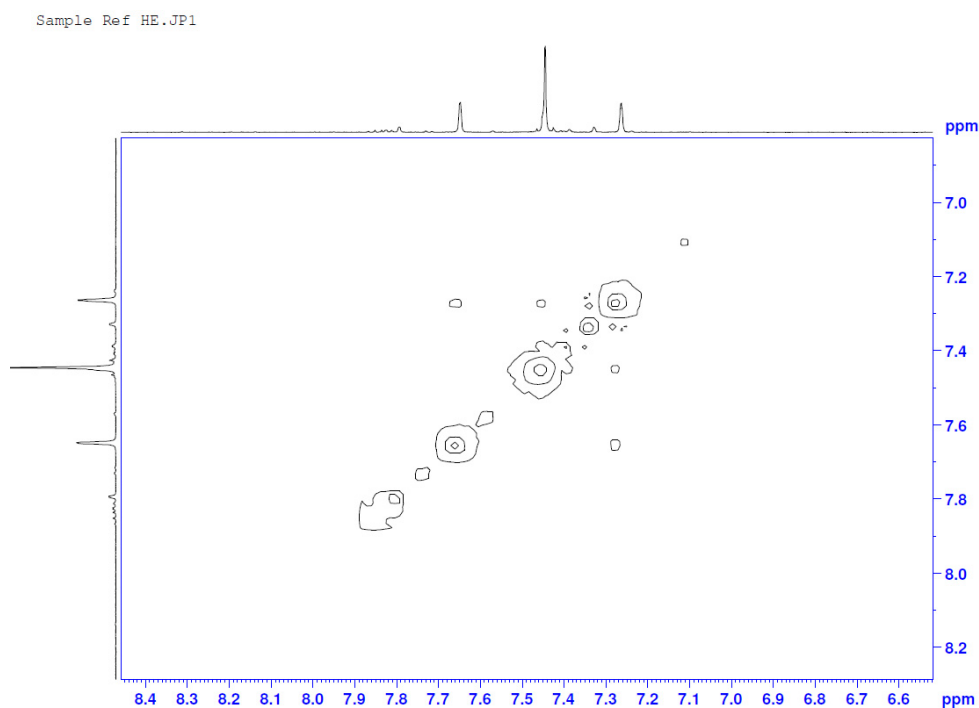

**Figure S0-42** Expand cosy of helminthosporin

Sample Ref HE.JP1

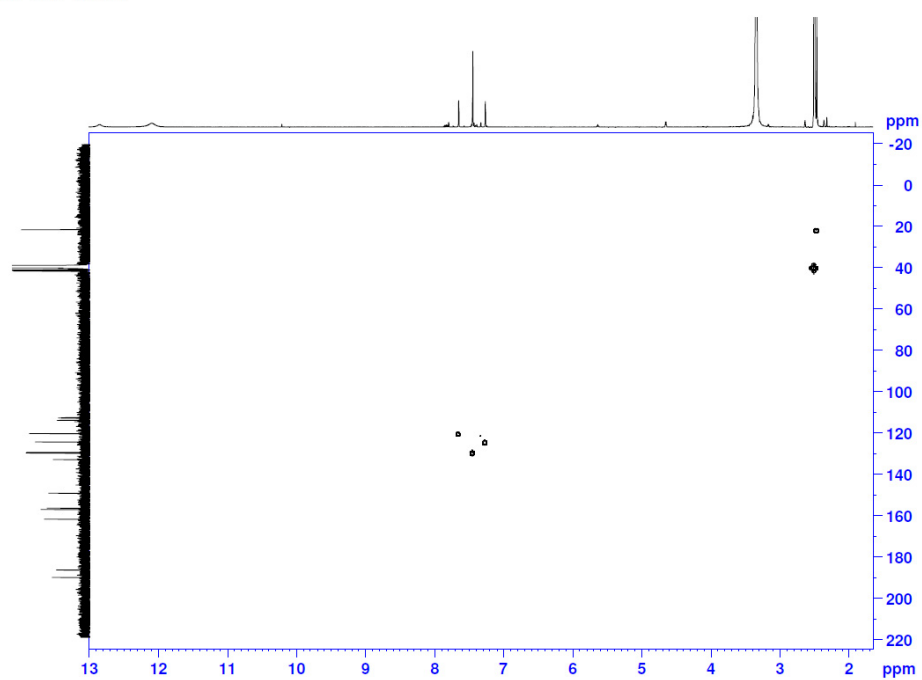

Figure S0-43 HMQC of helminthosporin

Sample Ref HE.JP1

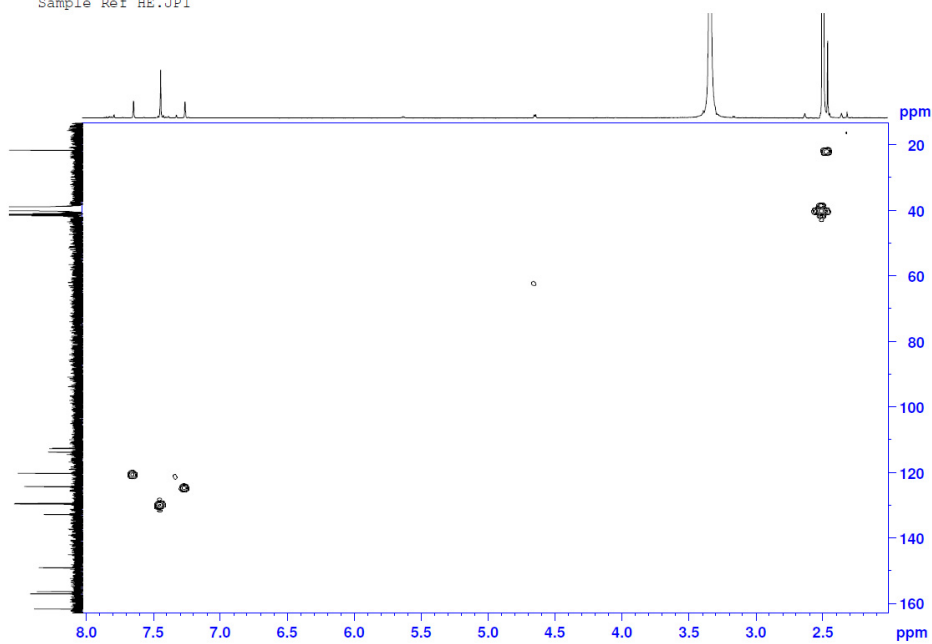

Figure S0-44 Expand HMQC of helminthosporin

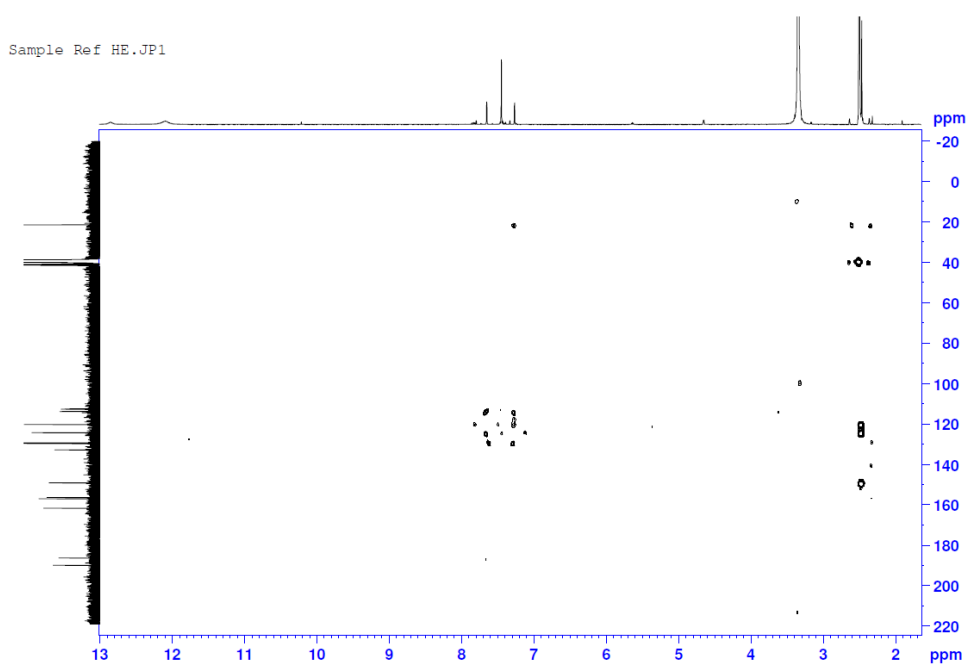

Figure S0-45 HMBC of helminthosporin

*Rugulosin*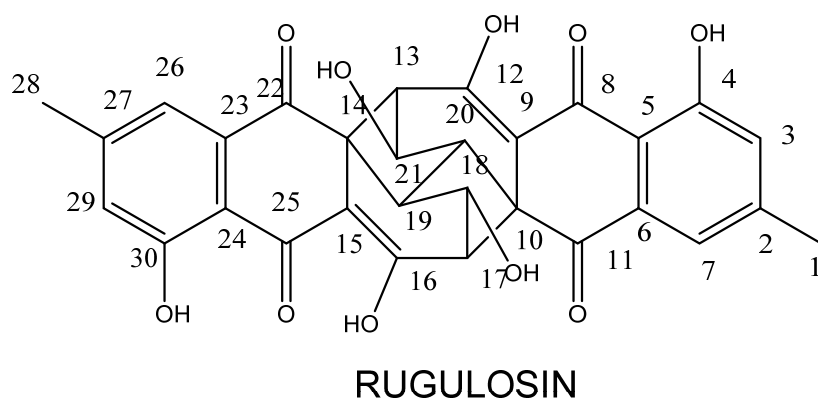

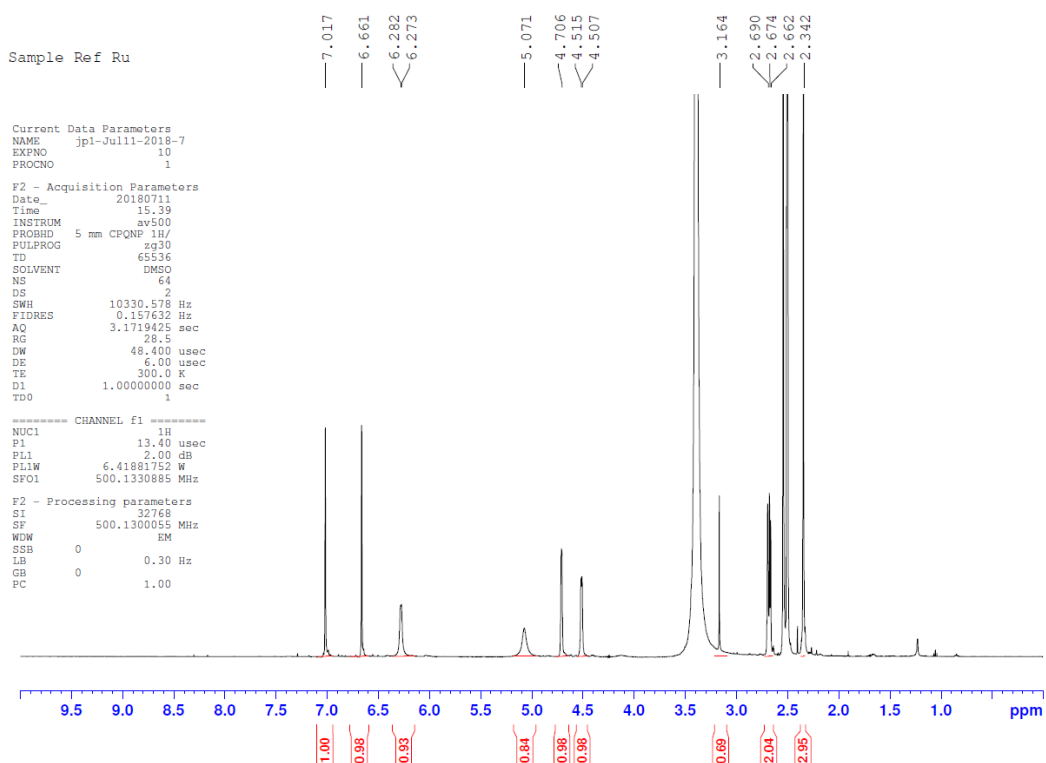Figure S0-46 <sup>1</sup>H NMR Chemical Shift of rugulosin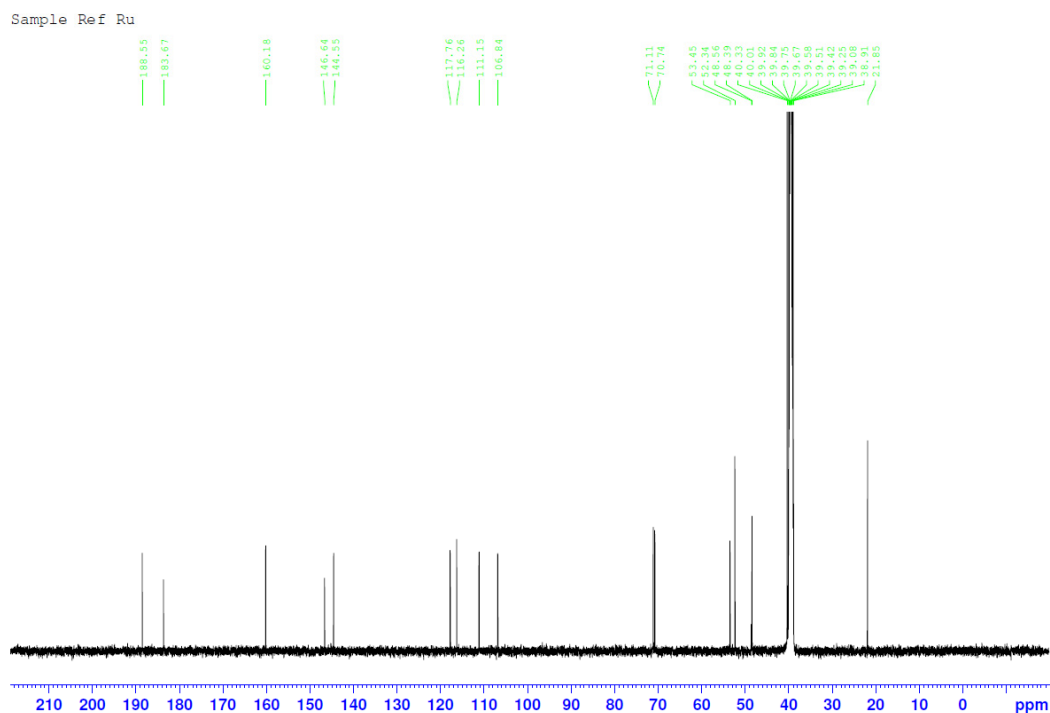Figure S0-47 <sup>13</sup>C NMR Chemical Shift of rugulosin

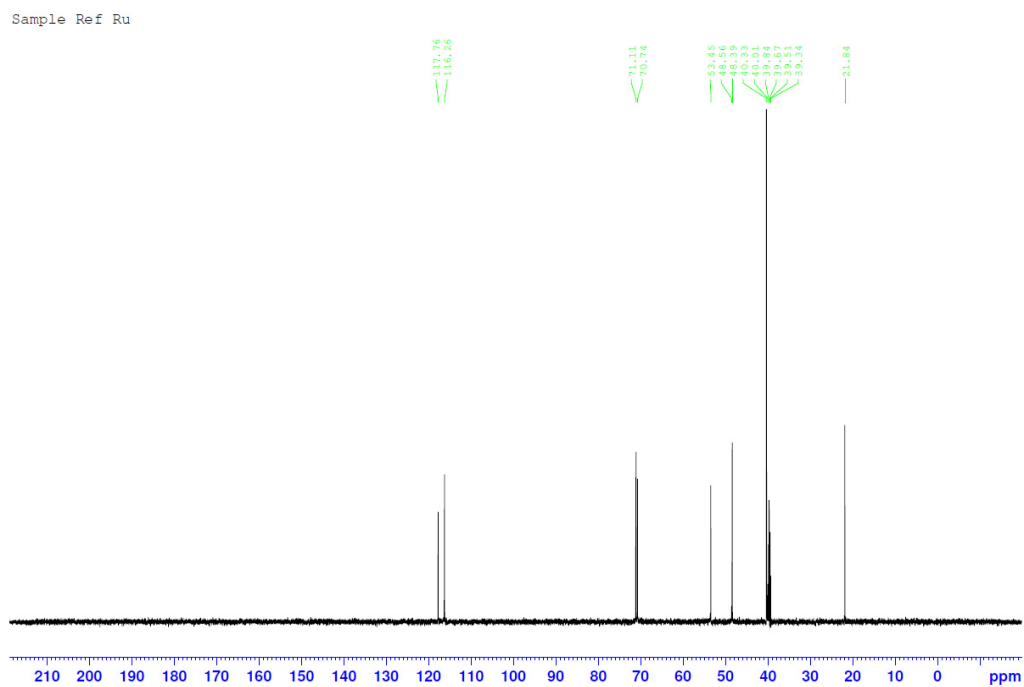

Figure S0-48 Dept 135 of rugulosin

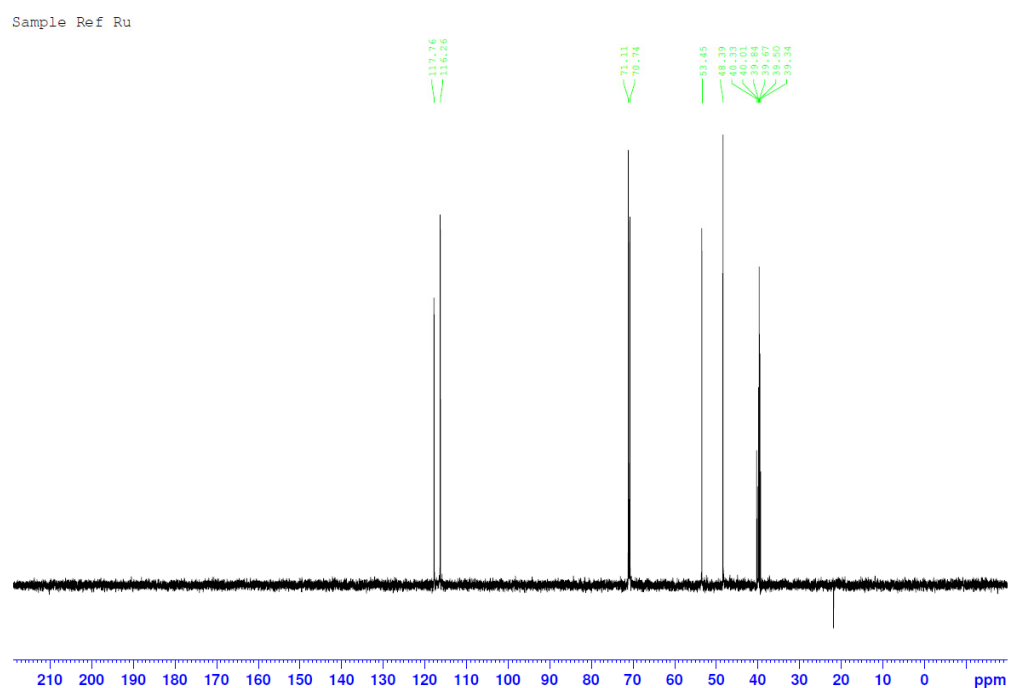

Figure S0-49 Dept 90 of rugulosin

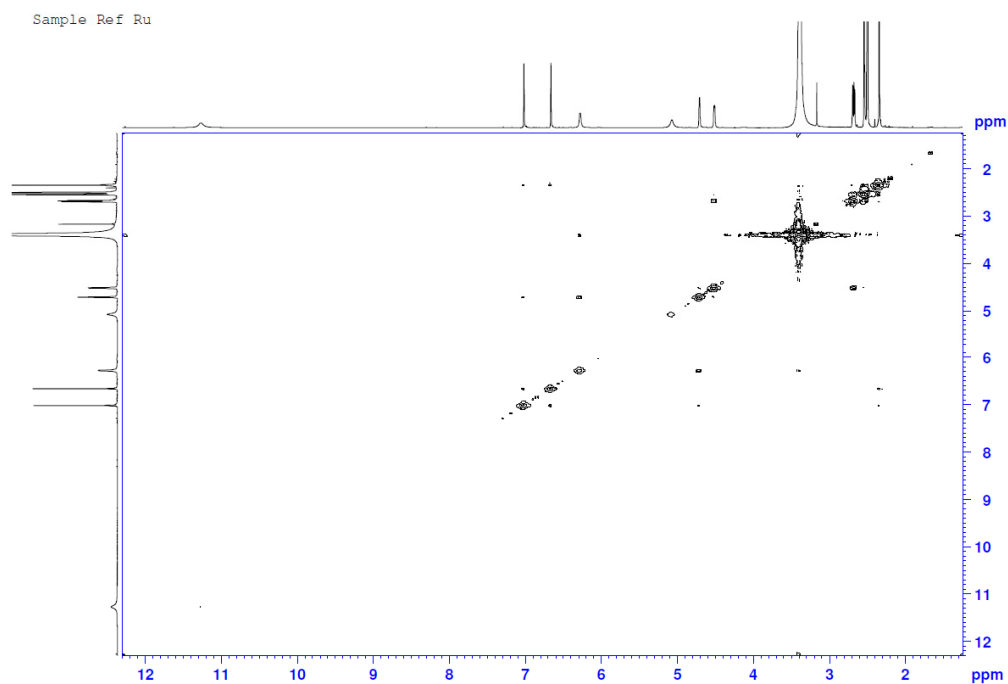

Figure S0-50 Cosy of rugulosin

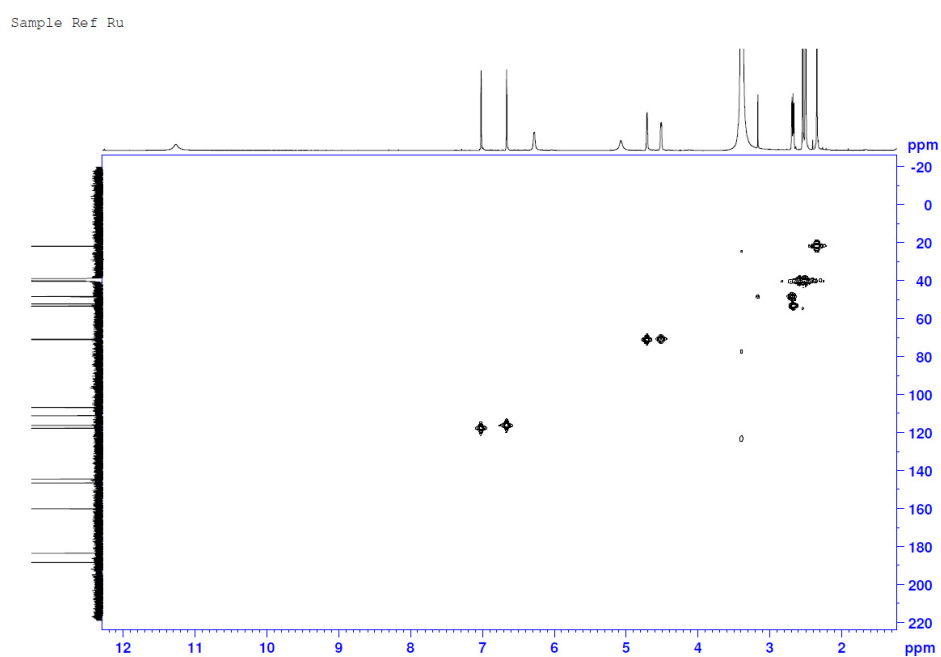

Figure S0-51 HMQC of rugulosin

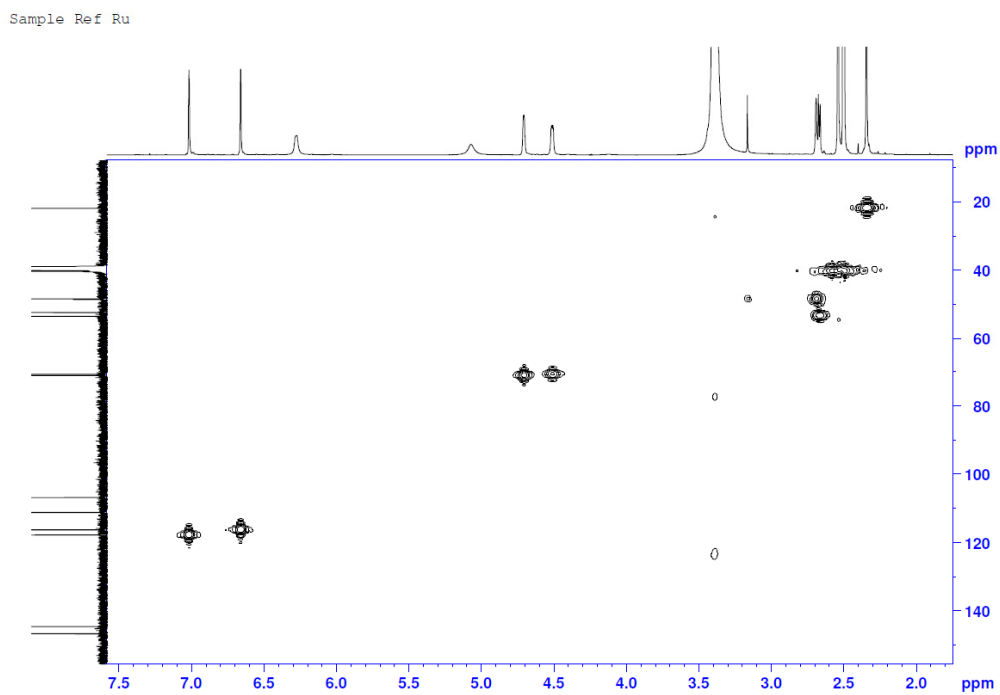

Figure S0-52 Expand HMQC of rugulosin

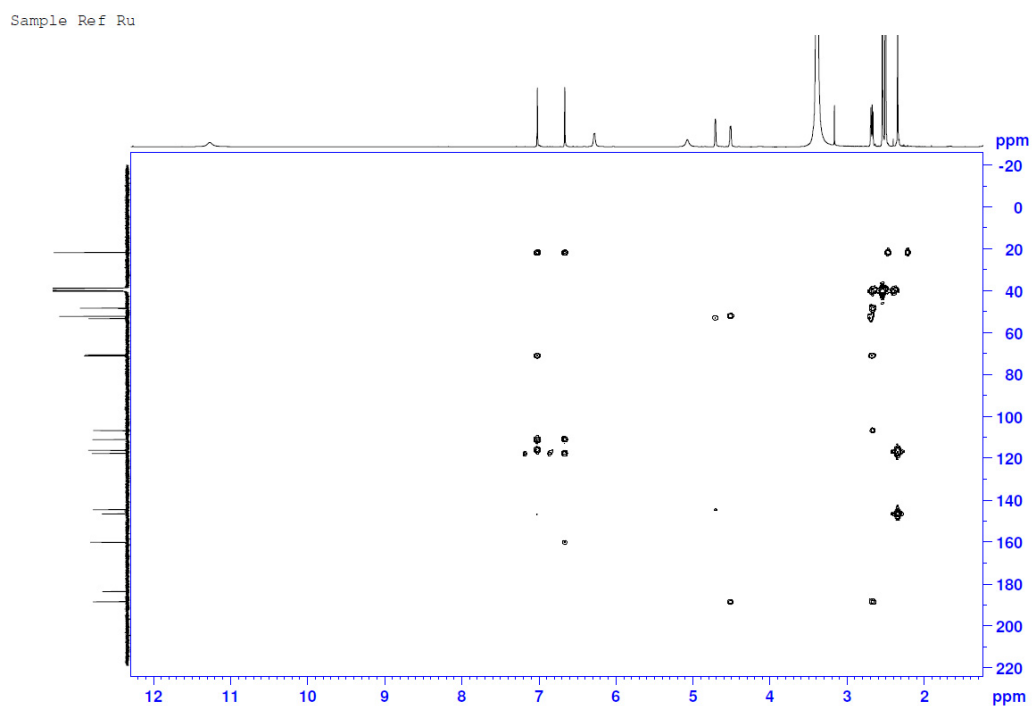

Figure S0-53 HMBC of rugulosin



Sample Ref Ru

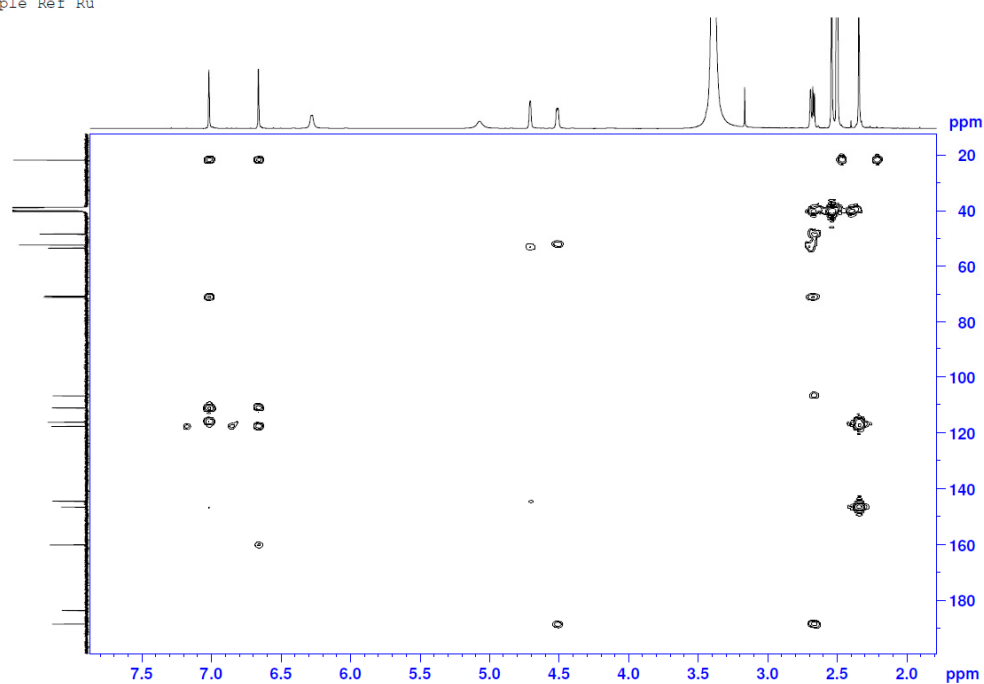

Figure S0-54 Expand HMBC of rugulosin

*Barbaloin*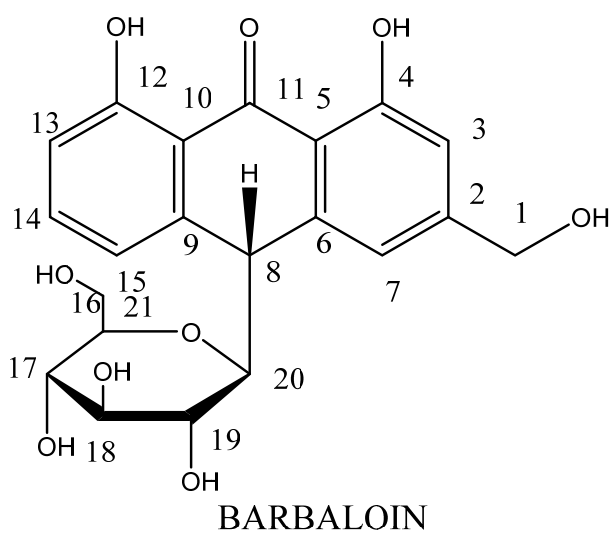

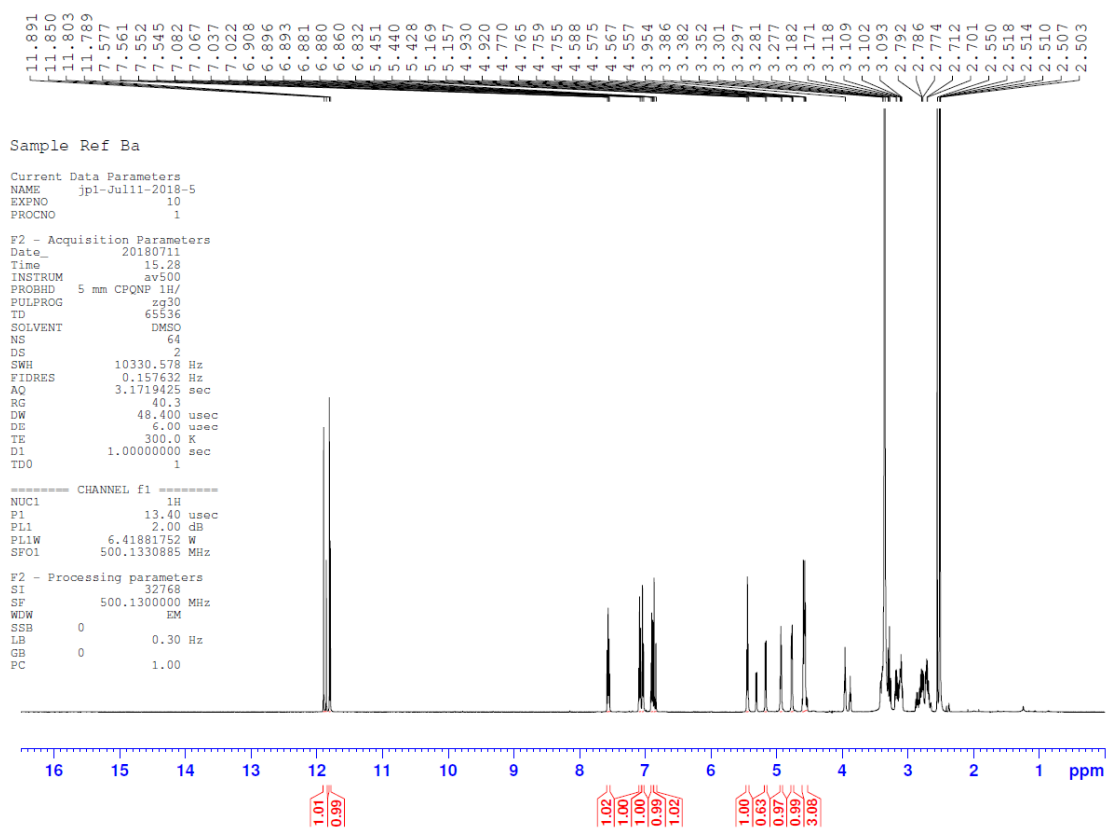Figure S0-55 <sup>1</sup>H NMR Chemical Shift of barbaloin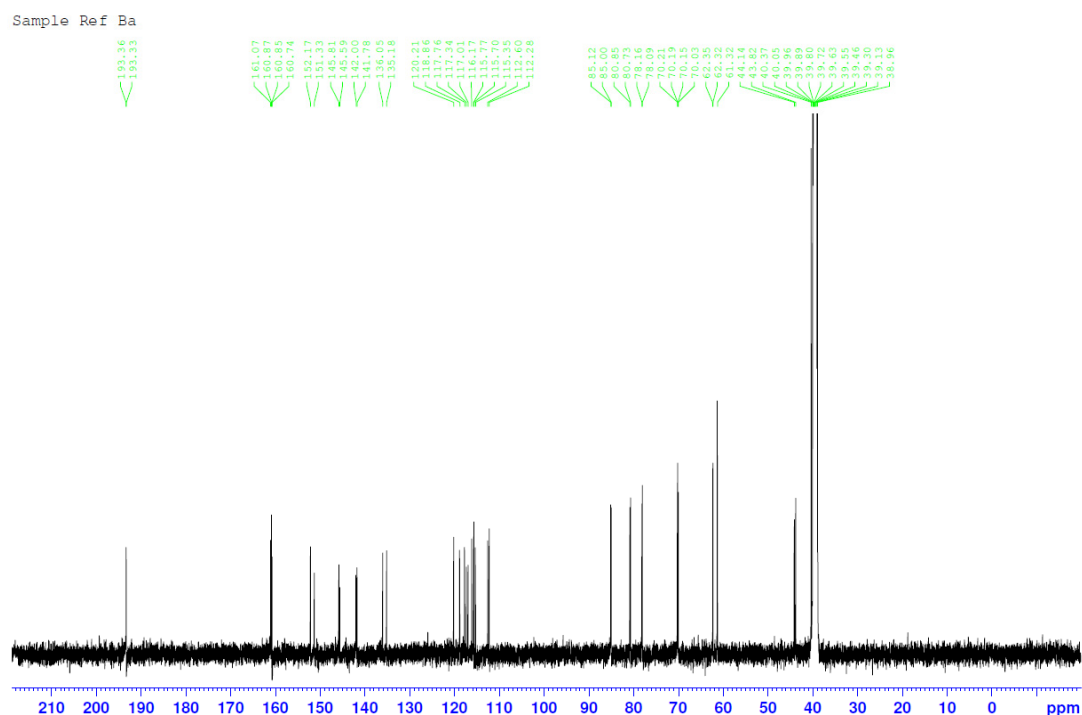Figure S0-56 <sup>13</sup>C NMR Chemical Shift of barbaloin

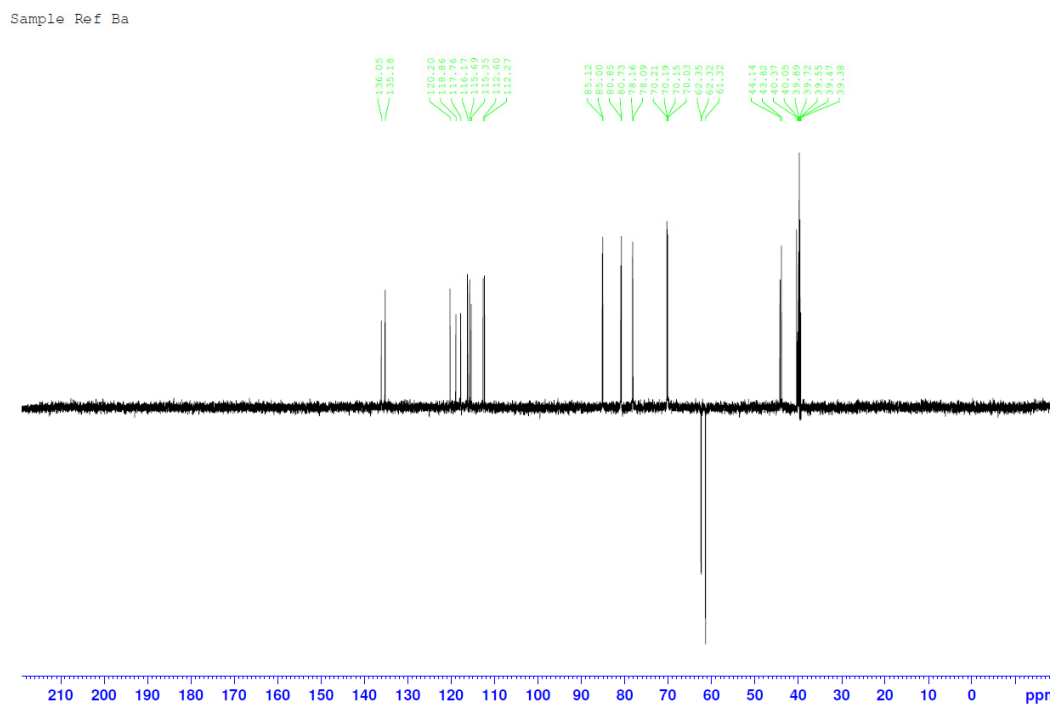

Figure S0-57 Dept 135 of barbaloin

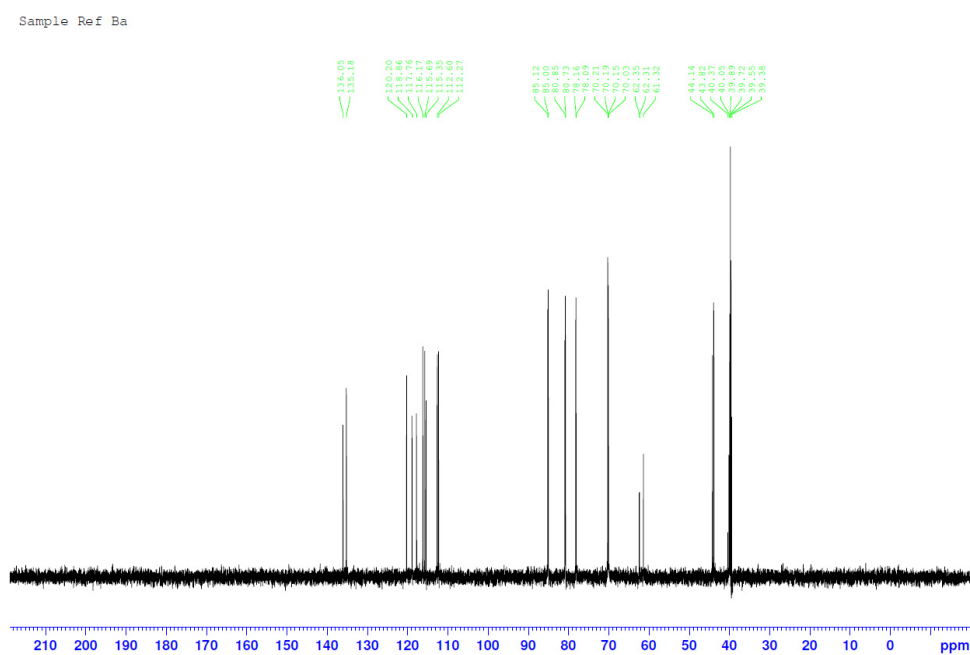

Figure S0-58 Dept 90 of barbaloin

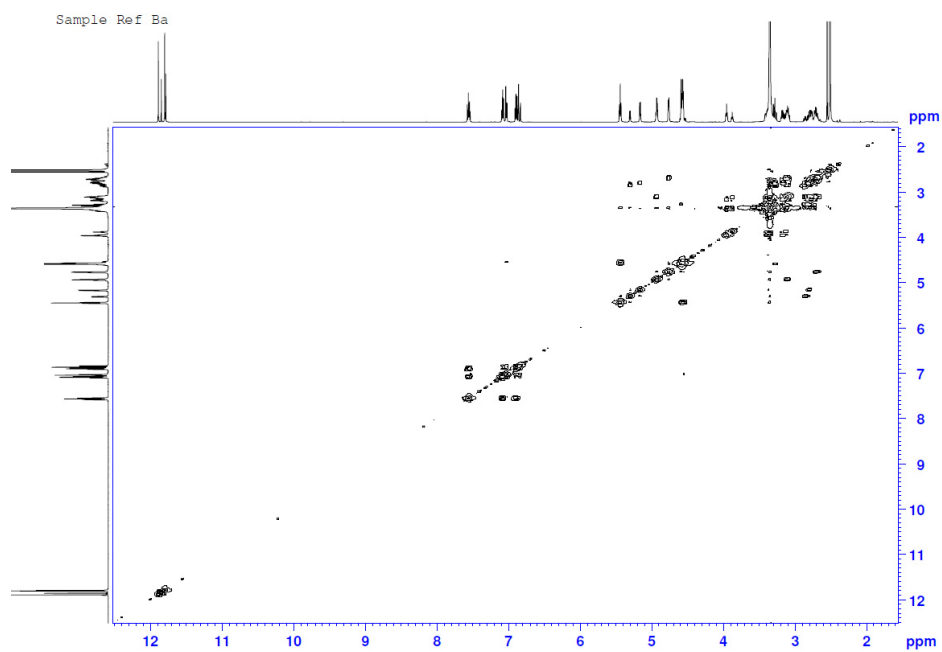

Figure S0-59 Cosy of barbaloin

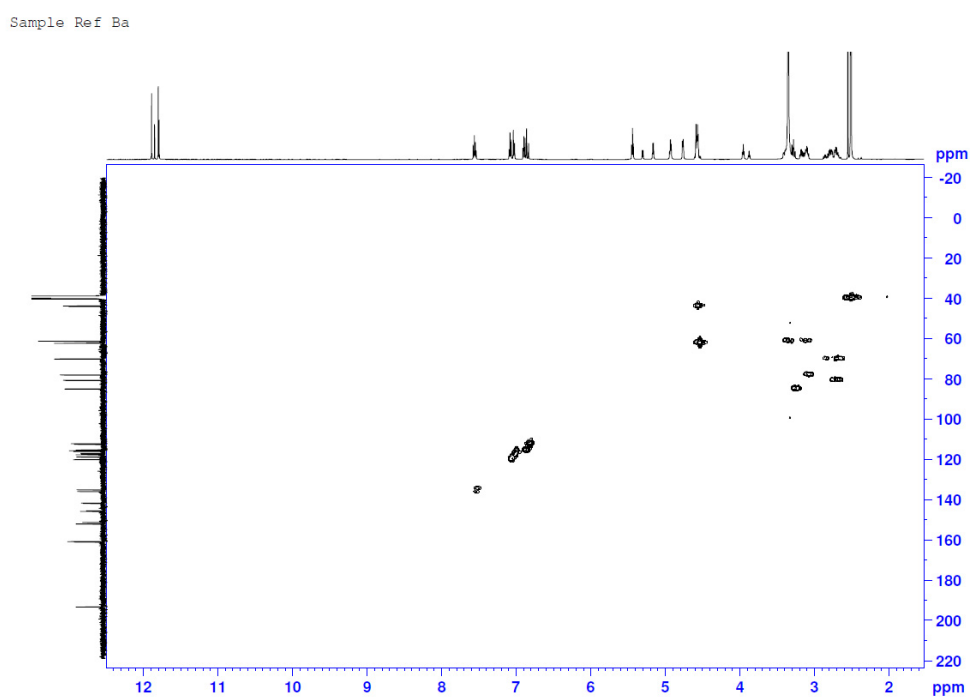

Figure S0-60 HMQC of barbaloin

Sample Ref Ba

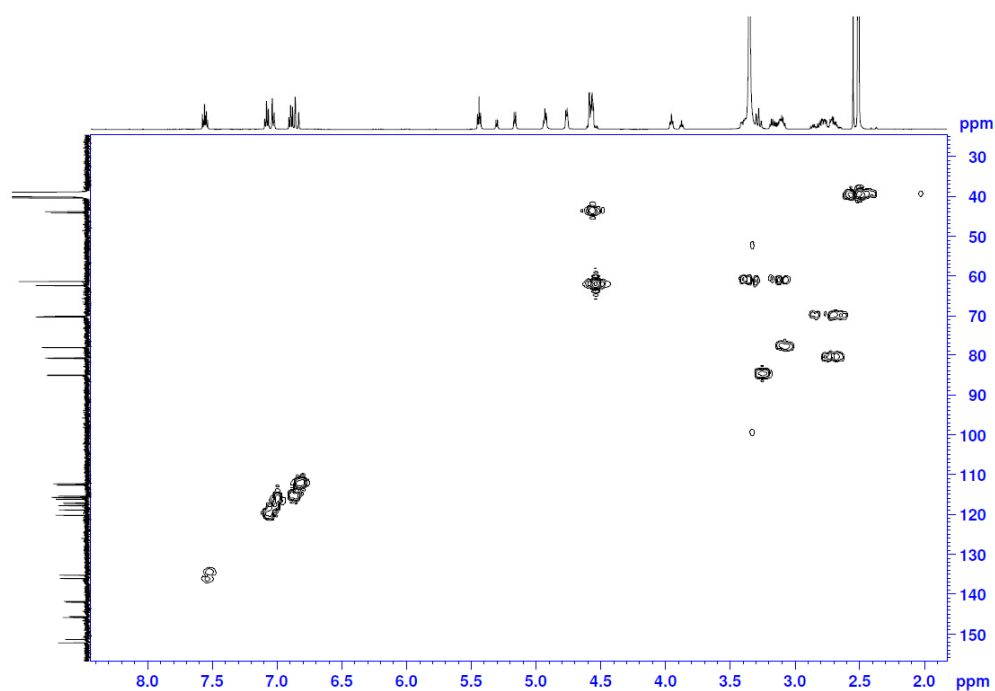

Figure S0-61 Expand HMQC of barbaloin

Sample Ref Ba

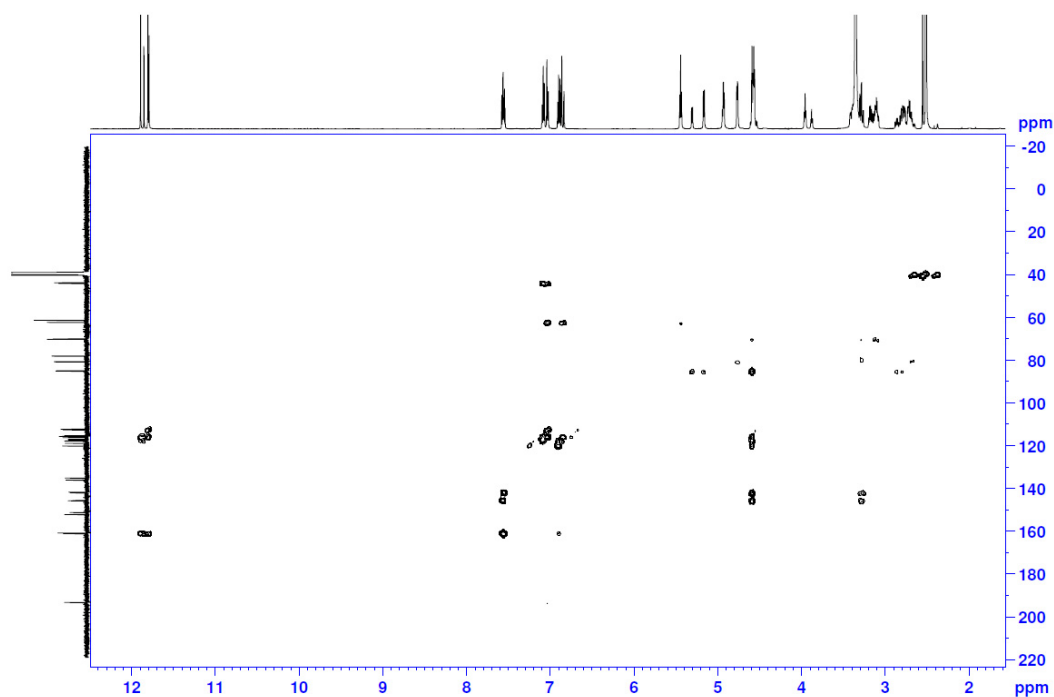

Figure S0-62 HMBC of barbaloin

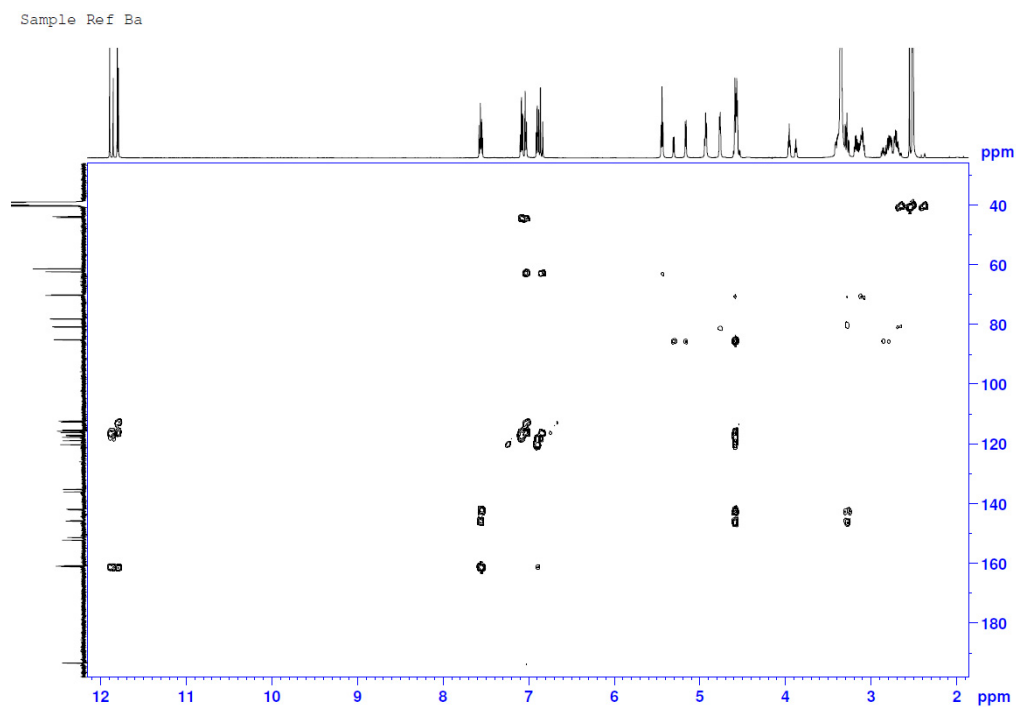

Figure S0-63 Expand HMBC of barbaloin
